# Supplementary material for: Cu(ii) flavonoids as potential photochemotherapeutic agents
Source: Royal Society of Chemistry journal article supplement (doi:10.1039/d3dt02663a), 2024-01-01
Supplement: d3dt02663a1.pdf [file d3dt02663a1.pdf]

**Electronic Supplementary Information (ESI†)  
for**

**Cu(II) flavonoids as potential photochemotherapeutic  
agents**

Namisha Das,<sup>a</sup> Bidisha Bora,<sup>a</sup> Aarti Upadhyay,<sup>b</sup> Dhananjay Das,<sup>a</sup> Arpan Bera,<sup>\*,b</sup> and Tridib

K. Goswami <sup>\*,a</sup>

<sup>a</sup> *Department of Chemistry, Gauhati University, Guwahati 781014, Assam, India*

<sup>b</sup> *Department of Inorganic and Physical Chemistry, Indian Institute of Science, Bangalore  
560012, India*

## Table of Contents

**Table S1.** Mass spectral data for the complexes **1-6** in acetonitrile.

**Table S2.** Cathodic and anodic current densities and their ratio for the Cu(II)/Cu(I) redox couple for the complexes **1-6** in DMF.

**Table S3.** EPR parameters of complex **2** in solid and solution phases.

**Table S4.** Selected bond distances (Å) and bond angles (°) of [Cu(L<sub>1</sub>)(phen)](ClO<sub>4</sub>) (**2**), where L<sub>1</sub> is monoanionic form of 4-fluoro-3-hydroxyflavone.

**Table S5.** Selected crystallographic data for the ligand 3-hydroxyflavone.

**Table S6.** Selected crystallographic data for the ligand 2,6-difluoro-3-hydroxyflavone.

**Table S7.** DNA and human serum albumin (HSA) binding constants for the complexes **1-6**.

**Table S8.** Rate constants (*k*) of singlet oxygen generation obtained from first order plot for the complexes **1-6**.

**Scheme S1.** Synthetic schemes of the complexes **1-6**.

**Fig. S1-S3** ESI Mass spectra of the ligands 3-hydroxy flavone, 4-fluoro-3-hydroxy flavone and 2,6-difluoro-3-hydroxy flavone in methanol showing the [M+H]<sup>+</sup> peaks.

**Fig. S4-S6** <sup>1</sup>H NMR spectra of the ligands 3-hydroxy flavone, 4-fluoro-3-hydroxy flavone and 2,6-difluoro-3-hydroxy flavone in CDCl<sub>3</sub>.

**Fig. S7-S12** IR spectra of the complexes **1-6** in solid KBr matrix.

**Fig. S13-S18** ESI Mass spectra of the complexes **1-6** in acetonitrile showing the [M-(ClO<sub>4</sub>)<sup>-</sup>]<sup>+</sup> peaks.

**Fig. S19** UV-visible spectra of **1-6** (25 μM) in DMSO-DMEM (1:9 v/v) showing the ligand-centered bands.

**Fig. S20** Cyclic voltammetric responses of complex **1-3** in DMF at a scan rate of 50 mVs<sup>-1</sup> using TBAP (0.1 M) as the supporting electrolyte.

**Fig. S21** Cyclic voltammetric responses of complex **1-3** in DMF at a scan rate of 50 mVs<sup>-1</sup> using TBAP (0.1 M) as the supporting electrolyte.

**Fig. S22** Cyclic voltammetric responses of the complexes **1** (a & b), **2** (c & d) and **3** (e & f) showing the anodic and cathodic responses corresponding to the flavonoids and phenanthroline bases present in the complexes in DMF at a scan rate of 50 mVs<sup>-1</sup> using TBAP (0.1 M) as the supporting electrolyte.

**Fig. S23** Cyclic voltammetric responses of the complexes **4** (a & b), **5** (c & d) and **6** (e & f) showing the anodic and cathodic responses corresponding to the flavonoids and phenanthroline

bases present in the complexes in DMF at a scan rate of  $50 \text{ mVs}^{-1}$  using TBAP (0.1 M) as the supporting electrolyte.

**Fig. S24** UV-visible spectra of the complexes **1** (a & b), **2** (c & d) and **3** (e & f) recorded in DMSO-Tris-HCl buffer (1:9, pH 7.2) for a period of 24 h.

**Fig. S25** UV-visible spectra of the complexes **4** (a & b), **5** (c & d) and **6** (e & f) recorded in DMSO-Tris-HCl buffer (1:9, pH 7.2) for a period of 24 h.

**Fig. S26** UV-visible spectra of the complexes **1** (a & b), **2** (c & d) and **3** (e & f) recorded in DMSO-DMEM (1:9 v/v) showing their photostability on exposure to visible light for a period of 60 min.

**Fig. S27** UV-visible spectra of the complexes **4** (a & b), **5** (c & d) and **6** (e & f) recorded in DMSO-DMEM (1:9 v/v) showing their photostability on exposure to visible light for a period of 60 min.

**Fig. S28** UV-visible spectral changes of the complexes **1** (a & b), **2** (c & d) and **3** (e & f) recorded in DMSO-DMEM (1:9 v/v) for a period of 24 h upon treatment with GSH (3 mM).

**Fig. S29** UV-visible spectral changes of the complexes **4** (a & b), **5** (c & d) and **6** (e & f) recorded in DMSO-DMEM (1:9 v/v) for a period of 24 h upon treatment with GSH (3 mM).

**Fig. S30** EPR spectra of complex **2** in solid (a) and solution (DMSO) (b) phases at 77K.

**Fig. S31** Unit cell packing diagram for the complex  $[\text{Cu}(\text{L}_1)(\text{phen})](\text{ClO}_4)$  (**2**), where  $\text{L}_1$  is monoanion of 4-fluoro-3-hydroxy flavone.

**Fig. S32** Unit cell packing diagram of ligand 3-hydroxy flavone.

**Fig. S33** Unit cell packing diagram of ligand 2,6-difluoro-3-hydroxy flavone.

**Fig. S34** ORTEP view of the ligand 3-hydroxy flavone showing 30% probability thermal ellipsoids.

**Fig. S35** ORTEP view of the ligand 2,6-difluoro-3-hydroxy flavone showing 30% probability thermal ellipsoids.

**Fig. S36** Absorption spectral traces of the complexes **1-3** (a-c) in 5 mM Tris-HCl buffer (pH 7.2) on increasing the quantity of calf thymus DNA. The inset shows the least square fits of  $\Delta\epsilon_{\text{af}}/\Delta\epsilon_{\text{bf}}$  vs. [DNA] for the complexes using McGhee-von Hippel (MvH) method.

**Fig. S37** Absorption spectral traces of the complexes **4-6** (a-c) in 5 mM Tris-HCl buffer (pH 7.2) on increasing the quantity of calf thymus DNA. The inset shows the least square fits of  $\Delta\epsilon_{\text{af}}/\Delta\epsilon_{\text{bf}}$  vs. [DNA] for the complexes using McGhee-von Hippel (MvH) method.

**Fig. S38** Emission spectral traces of HSA (2  $\mu\text{M}$ ) in the presence of complexes **1-3** (a-c). The inset shows the plot of  $(I_0/I)$  vs. [complex].

**Fig. S39** Emission spectral traces of HSA (2  $\mu\text{M}$ ) in the presence of complexes **4-6** (a-c). The inset shows the plot of  $(I_0/I)$  vs. [complex].

**Fig. S40** Fluorescence spectra of HTA solution resulting from the reaction of TA (2 mM) with  $\bullet\text{OH}$  radical generated by the complexes (a) **1**, (b) **2** and (c) **3** (25  $\mu\text{M}$ ) on exposure to visible light for different time interval.

**Fig. S41** Fluorescence spectra of HTA solution resulting from the reaction of TA (2 mM) with  $\bullet\text{OH}$  radical generated by the complexes (a) **4**, (b) **5** and (c) **6** (25  $\mu\text{M}$ ) on exposure to visible light for different time interval.

**Fig. S42** A comparison of the increase in concentration of HTA from the reaction of TA (2 mM) with  $\bullet\text{OH}$  radical generated by the complexes **1-6** (25  $\mu\text{M}$ ) on exposure to visible light for different time interval.

**Fig. S43** Absorption spectral traces of 1,3-diphenylisobenzofuran (DPBF) (1 mM) in presence of complexes (a) **1**, (c) **2** and (e) **3** (25  $\mu\text{M}$ ) on visible light irradiation for different time interval indicating generation of  $^1\text{O}_2$ . The panels (b) **1**, (d) **2** and (f) **3** show the first-order plot of absorbance of DPBF versus irradiation time for the complexes.

**Fig. S44** Absorption spectral traces of 1,3-diphenylisobenzofuran (DPBF) (1 mM) in presence of complexes (a) **4**, (c) **5** and (e) **6** (25  $\mu\text{M}$ ) on visible light irradiation for different time interval indicating generation of  $^1\text{O}_2$ . The panels (b) **4**, (d) **5** and (f) **6** show the first-order plot of absorbance of DPBF versus irradiation time for the complexes.

**Fig. S45** Absorption spectral traces of 1,3-diphenylisobenzofuran (DPBF) (1 mM) in presence of complexes (a) **1**, (b) **2**, (c) **3**, (d) **4**, (e) **5** and (e) **6** (25  $\mu\text{M}$ ) in dark at different time interval indicating that there is no significant generation of  $^1\text{O}_2$ .

**Fig. S46-S50** Cell viability plots showing the cytotoxic effect of complex **1-5** in (a) MCF-7 and (b) A549 cells in dark (black) and in the presence of visible light (red, 400-700 nm, 10 J  $\text{cm}^{-2}$ , 1 h).

**Fig. S51** Cell viability plots showing the cytotoxic effect of the complex **1-6** in HPL1D cells in dark (black) and in the presence of visible light (green, 400-700 nm, 10 J  $\text{cm}^{-2}$ , 1 h).

**Table S1.** Mass spectral data for the complexes **1-6** in acetonitrile.

| Complex  | Molecular formula                            | Calculated m/z<br>[M-(ClO <sub>4</sub> )] <sup>+</sup> | Experimental m/z<br>[M-(ClO <sub>4</sub> )] <sup>+</sup> |
|----------|----------------------------------------------|--------------------------------------------------------|----------------------------------------------------------|
| <b>1</b> | [Cu(HF <sub>1</sub> )(phen)]ClO <sub>4</sub> | 480.0535                                               | 480.1063                                                 |
| <b>2</b> | [Cu(HF <sub>2</sub> )(phen)]ClO <sub>4</sub> | 498.0441                                               | 498.0460                                                 |
| <b>3</b> | [Cu(HF <sub>3</sub> )(phen)]ClO <sub>4</sub> | 516.0347                                               | 516.1758                                                 |
| <b>4</b> | [Cu(HF <sub>1</sub> )(aip)]ClO <sub>4</sub>  | 696.1223                                               | 696.1470                                                 |
| <b>5</b> | [Cu(HF <sub>2</sub> )(aip)]ClO <sub>4</sub>  | 714.1128                                               | 714.1206                                                 |
| <b>6</b> | [Cu(HF <sub>3</sub> )(aip)]ClO <sub>4</sub>  | 732.1034                                               | 732.1679                                                 |

**Table S2.** Cathodic and anodic current densities and their ratio for the Cu(II)/Cu(I) redox couple for the complexes **1-6** in DMF.

| <b>Complex</b> | <b><math>i_{c_p}</math></b> | <b><math>i_{c_a}</math></b> | <b><math>i_{c_p}/i_{c_a}</math></b> |
|----------------|-----------------------------|-----------------------------|-------------------------------------|
| <b>1</b>       | 4.806                       | 4.400                       | 1.09                                |
| <b>2</b>       | 4.381                       | 4.050                       | 1.08                                |
| <b>3</b>       | 4.071                       | 3.862                       | 1.05                                |
| <b>4</b>       | 5.501                       | 5.741                       | 0.95                                |
| <b>5</b>       | 3.900                       | 4.394                       | 0.90                                |
| <b>6</b>       | 4.008                       | 3.900                       | 1.02                                |

**Table S3.** EPR parameters of complex **2** in solid and solution phases.

| Sample type           | $g_x$ | $g_y$ | $g_z$ | $R^a$      | ground state                                | geometry                                   |
|-----------------------|-------|-------|-------|------------|---------------------------------------------|--------------------------------------------|
| Powder                | 2.21  | 2.21  | 2.05  | $\infty$   | $d_z^2$                                     | Square pyramid                             |
| Solution <sup>b</sup> | 2.37  | 2.093 | 2.001 | 0.332 (<1) | $C_1 d_z^2\rangle + C_2 d_{x^2-y^2}\rangle$ | Intermediate<br>pyramid-trigonal bipyramid |

<sup>a</sup>  $R = g_y - g_z / g_x - g_y$

<sup>b</sup> in DMSO

**Table S4.** Selected bond distances (Å) and bond angles (°) of [Cu(L<sub>1</sub>)(phen)](ClO<sub>4</sub>) (**2**), where L<sub>1</sub> is monoanionic form of 4-fluoro-3-hydroxyflavone.

|           |           |           |            |
|-----------|-----------|-----------|------------|
| Cu1-O1    | 1.920(2)  | O2-Cu1-N2 | 172.92(11) |
| Cu1-O2    | 1.936(2)  | O1-Cu1-N1 | 179.43(11) |
| Cu1-N1    | 1.965(3)  | O2-Cu1-N1 | 94.56(11)  |
| Cu1-N2    | 1.979(3)  | N1-Cu1-N2 | 83.94(12)  |
| Cu2-O4    | 1.916(2)  | O4-Cu2-O5 | 85.79(10)  |
| Cu2-O5    | 1.940(3)  | O4-Cu2-N4 | 178.01(11) |
| Cu2-N3    | 1.982(3)  | O5-Cu2-N4 | 95.86(11)  |
| Cu2-N4    | 1.977(3)  | O4-Cu2-N3 | 94.78(11)  |
| O1-Cu1-O2 | 86.01(10) | O5-Cu2-N3 | 172.74(11) |
| O1-Cu1-N2 | 95.49(11) | N4-Cu2-N3 | 83.73(12)  |



**Table S5.** Selected crystallographic data for the ligand 3-hydroxyflavone.

|                                                                                                                         |                                                       |
|-------------------------------------------------------------------------------------------------------------------------|-------------------------------------------------------|
| Empirical formula                                                                                                       | C <sub>15</sub> H <sub>10</sub> O <sub>3</sub>        |
| Fw, g M <sup>-1</sup>                                                                                                   | 238.23                                                |
| Crystal system                                                                                                          | orthorhombic                                          |
| Space group                                                                                                             | <i>P</i> 2 <sub>1</sub> 2 <sub>1</sub> 2 <sub>1</sub> |
| <i>a</i> , Å                                                                                                            | 5.4597(5)                                             |
| <i>b</i> , Å                                                                                                            | 11.4059(12)                                           |
| <i>c</i> , Å                                                                                                            | 18.1880(16)                                           |
| $\alpha$ , °                                                                                                            | 90                                                    |
| $\beta$ , °                                                                                                             | 90                                                    |
| $\gamma$ , °                                                                                                            | 90                                                    |
| <i>V</i> , Å <sup>3</sup>                                                                                               | 1132.62(19)                                           |
| <i>Z</i>                                                                                                                | 4                                                     |
| <i>T</i> , K                                                                                                            | 296(2)                                                |
| $\rho_{\text{calcd}}$ , g cm <sup>-3</sup>                                                                              | 1.397                                                 |
| $\lambda$ , Å (Mo-K $\alpha$ )                                                                                          | 0.71073                                               |
| $\mu$ , cm <sup>-1</sup>                                                                                                | 0.098                                                 |
| Data / restraints / parameters                                                                                          | 2871 / 0 / 168                                        |
| <i>F</i> (000)                                                                                                          | 496                                                   |
| Goodness-of-fit                                                                                                         | 1.060                                                 |
| <i>R</i> ( <i>F</i> <sub>o</sub> ) <sup>a</sup> , I>2 $\sigma$ (I) [ <i>Rw</i> ( <i>F</i> <sub>o</sub> ) <sup>b</sup> ] | 0.0407 [0.0872]                                       |
| <i>R</i> (all data) [ <i>Rw</i> (all data)]                                                                             | 0.0514 [0.0923]                                       |
| Largest diff. peak and hole (e Å <sup>-3</sup> )                                                                        | 0.168, -0.184                                         |

<sup>a</sup> $R = \Sigma||F_o| - |F_c|| / \Sigma|F_o|$ , <sup>b</sup> $Rw = \{\Sigma[w(F_o^2 - F_c^2)^2] / \Sigma[w(F_o^2)]\}^{1/2}$ ;  $w = [\sigma^2(F_o)^2 + (AP)^2 + BP]^{-1}$ , where  $P = (F_o^2 + 2F_c^2)/3$ , A = 0.0432; B = 0.0366.

**Table S6.** Selected crystallographic data for the ligand 2,6-difluoro-3-hydroxyflavone.

|                                                                                                                         |                                                              |
|-------------------------------------------------------------------------------------------------------------------------|--------------------------------------------------------------|
| Empirical formula                                                                                                       | C <sub>15</sub> H <sub>8</sub> F <sub>2</sub> O <sub>3</sub> |
| Fw, g M <sup>-1</sup>                                                                                                   | 274.21                                                       |
| Crystal system                                                                                                          | monoclinic                                                   |
| Space group                                                                                                             | <i>P</i> 21/ <i>c</i>                                        |
| <i>a</i> , Å                                                                                                            | 10.7113(18)                                                  |
| <i>b</i> , Å                                                                                                            | 15.507(2)                                                    |
| <i>c</i> , Å                                                                                                            | 7.1679(10)                                                   |
| $\alpha$ , °                                                                                                            | 90                                                           |
| $\beta$ , °                                                                                                             | 91.00                                                        |
| $\gamma$ , °                                                                                                            | 90                                                           |
| <i>V</i> , Å <sup>3</sup>                                                                                               | 1190.4(3)                                                    |
| <i>Z</i>                                                                                                                | 4                                                            |
| <i>T</i> , K                                                                                                            | 296(2)                                                       |
| $\rho_{\text{calcd}}$ , g cm <sup>-3</sup>                                                                              | 1.530                                                        |
| $\lambda$ , Å (Mo-K $\alpha$ )                                                                                          | 0.71073                                                      |
| $\mu$ , cm <sup>-1</sup>                                                                                                | 0.127                                                        |
| Data / restraints / parameters                                                                                          | 3028 / 0 / 186                                               |
| <i>F</i> (000)                                                                                                          | 560                                                          |
| Goodness-of-fit                                                                                                         | 1.072                                                        |
| <i>R</i> ( <i>F</i> <sub>o</sub> ) <sup>a</sup> , I>2 $\sigma$ (I) [ <i>Rw</i> ( <i>F</i> <sub>o</sub> ) <sup>b</sup> ] | 0.0643 [0.0803]                                              |
| <i>R</i> (all data) [ <i>Rw</i> (all data)]                                                                             | 0.1613 [0.1771]                                              |
| Largest diff. peak and hole (e Å <sup>-3</sup> )                                                                        | 0.440, -0.463                                                |

<sup>a</sup> $R = \Sigma||F_o| - |F_c|| / \Sigma|F_o|$ , <sup>b</sup> $Rw = \{\Sigma[w(F_o^2 - F_c^2)^2] / \Sigma[w(F_o^2)]\}^{1/2}$ ;  $w = [\sigma^2(F_o)^2 + (AP)^2 + BP]^{-1}$ , where  $P = (F_o^2 + 2F_c^2)/3$ , A = 0.1108; B = 0.

**Table S7.** DNA and human serum albumin (HSA) binding constants for the complexes **1-6**.

| Complex  | Binding constant (M <sup>-1</sup> ) |                                |
|----------|-------------------------------------|--------------------------------|
|          | HSA                                 | <i>ct</i> -DNA                 |
| <b>1</b> | 6.28 (±0.13) × 10 <sup>4</sup>      | 3.96 (±0.16) × 10 <sup>5</sup> |
| <b>2</b> | 9.86 (±0.10) × 10 <sup>4</sup>      | 5.47 (±0.02) × 10 <sup>5</sup> |
| <b>3</b> | 1.03 (±0.01) × 10 <sup>5</sup>      | 5.85 (±0.25) × 10 <sup>5</sup> |
| <b>4</b> | 1.05 (±0.01) × 10 <sup>5</sup>      | 6.51 (±0.02) × 10 <sup>5</sup> |
| <b>5</b> | 1.26 (±0.02) × 10 <sup>5</sup>      | 7.76 (±0.30) × 10 <sup>5</sup> |
| <b>6</b> | 1.70 (±0.02) × 10 <sup>5</sup>      | 9.91 (±0.23) × 10 <sup>5</sup> |

**Table S8.** Rate constants ( $k$ ) of singlet oxygen generation obtained from first order plot for the complexes **1-6**.

| Complex  | Rate constant ( $k$ )/ min       |
|----------|----------------------------------|
| <b>1</b> | $1.76 (\pm 0.04) \times 10^{-2}$ |
| <b>2</b> | $2.28 (\pm 0.07) \times 10^{-2}$ |
| <b>3</b> | $3.04 (\pm 0.08) \times 10^{-2}$ |
| <b>4</b> | $3.10 (\pm 0.05) \times 10^{-2}$ |
| <b>5</b> | $3.16 (\pm 0.07) \times 10^{-2}$ |
| <b>6</b> | $4.67 (\pm 0.11) \times 10^{-2}$ |

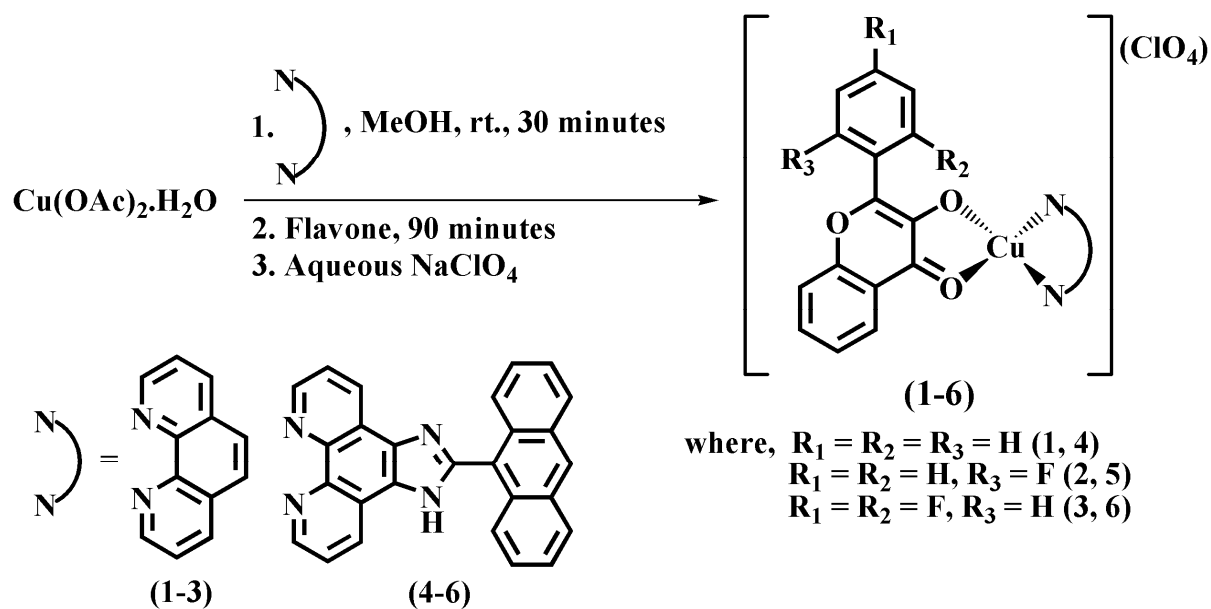

**Scheme S1** Synthetic schemes of the complexes 1-6.

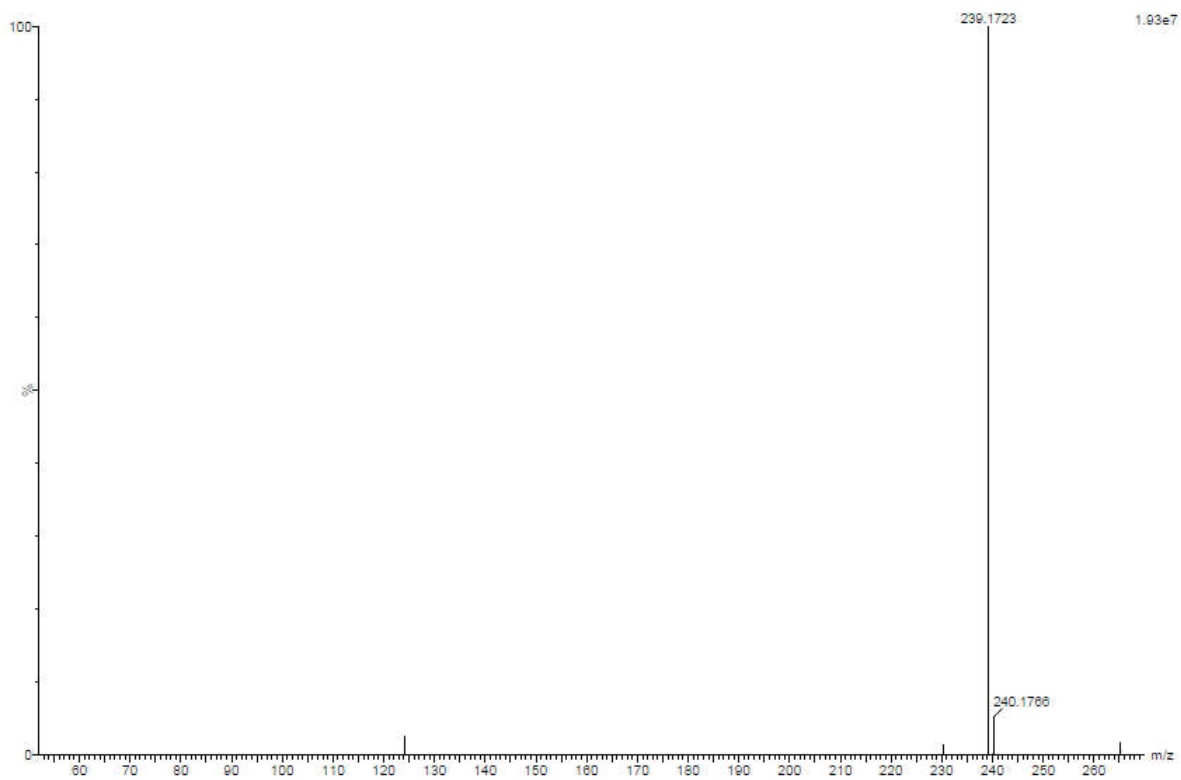

**Fig. S1** ESI Mass spectrum of the ligand 3-hydroxy flavone in methanol showing the  $[M+H]^+$  peak at  $m/z = 239.1723$ .

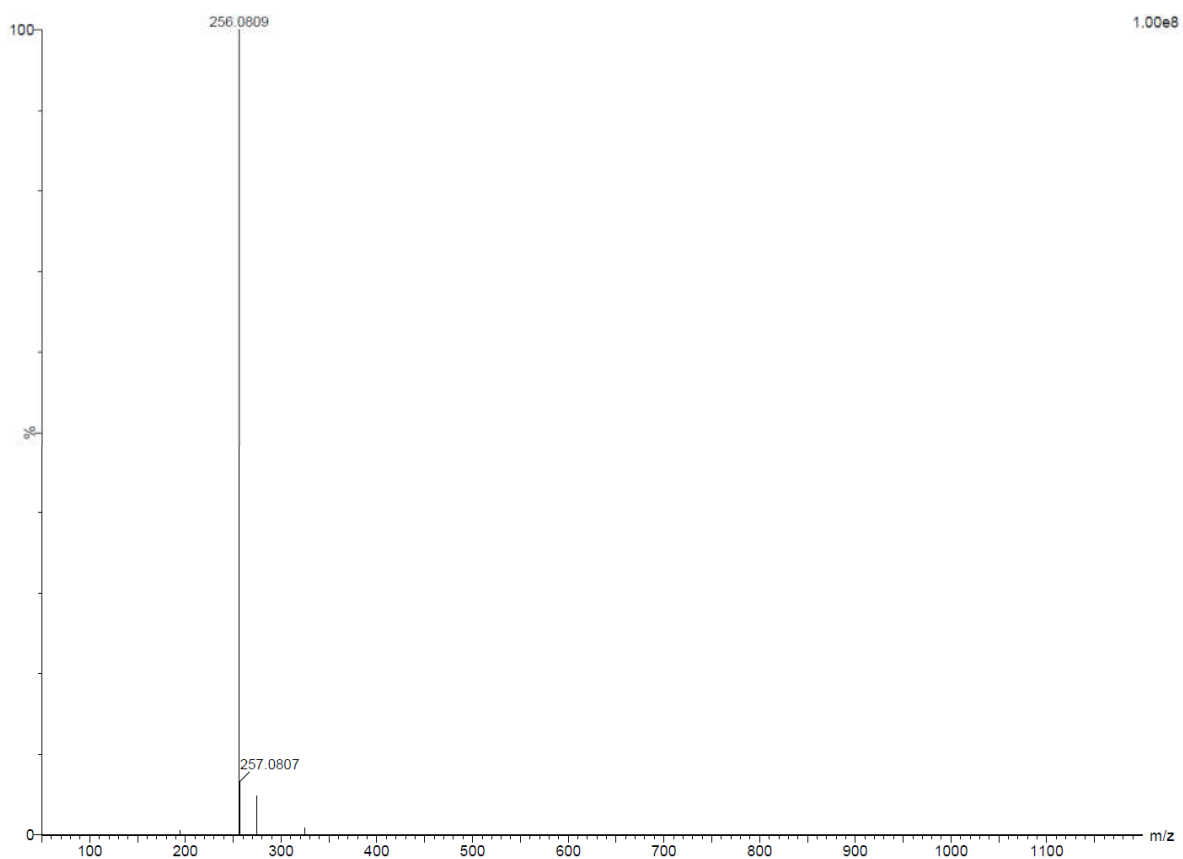

**Fig. S2** ESI Mass spectrum of the ligand 4-fluoro-3-hydroxy flavone in methanol showing the  $[M+H]^+$  peak at  $m/z = 256.0809$ .

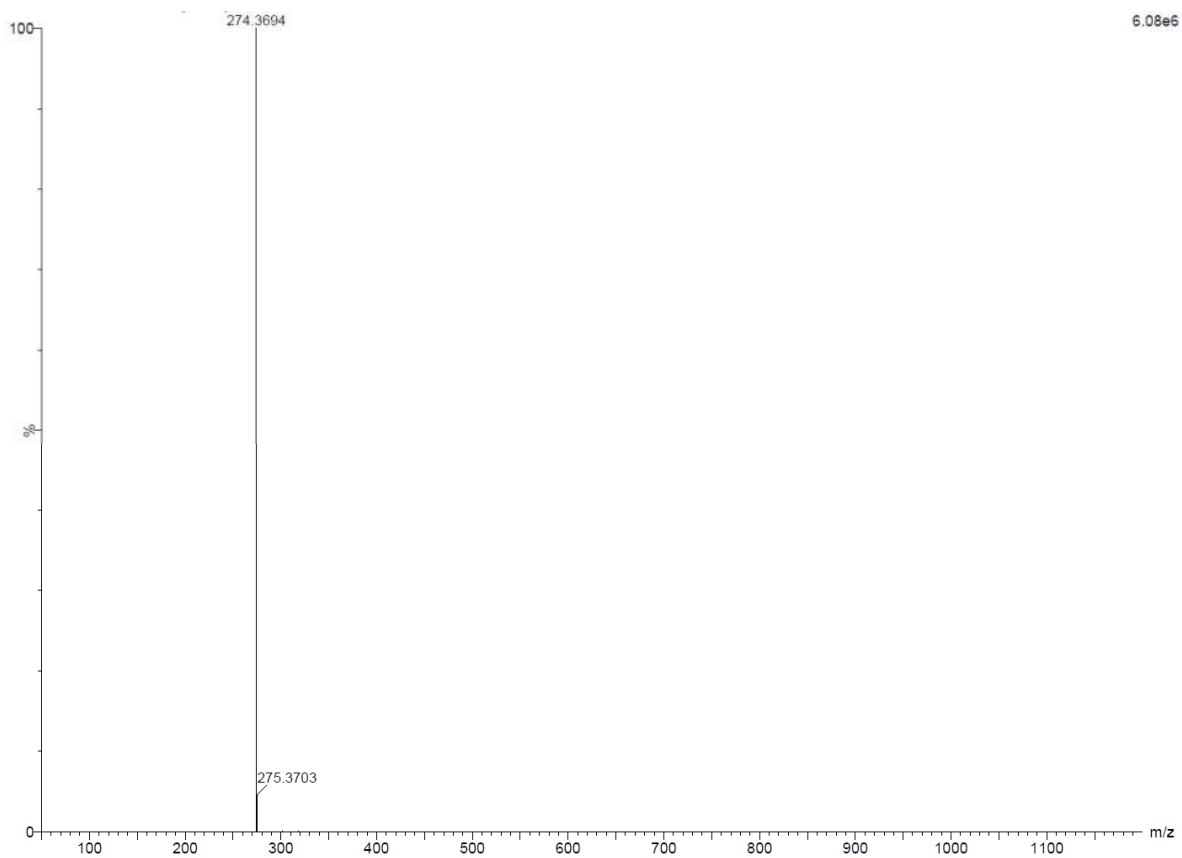

**Fig. S3** ESI Mass spectrum of the ligand 2,6-difluoro-3-hydroxy flavone in methanol showing the  $[M+H]^+$  peak at  $m/z = 274.3694$ .



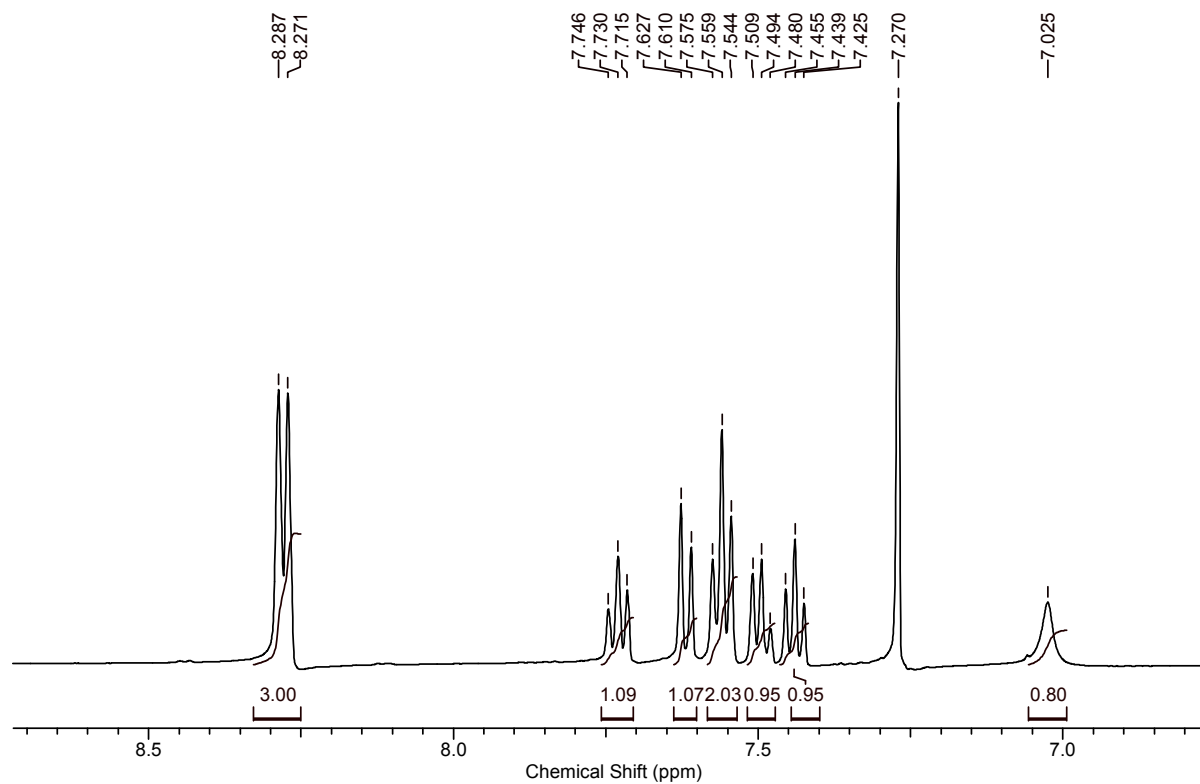

**Fig. S4**  $^1\text{H}$  NMR spectrum of the ligand 3-hydroxy flavone in  $\text{CDCl}_3$ .

$^1\text{H}$  NMR (500 MHz,  $\text{CDCl}_3$ ): 8.27(d,  $J=8$ , 3H), 7.73(t,  $J=8$ , 1H), 7.61(d,  $J=8.5$ , 1H), 7.55(t,  $J=8$ , 2H), 7.50-7.48(m, 1H), 7.43(t,  $J=8$ , 1H), 7.02(s, 1H).

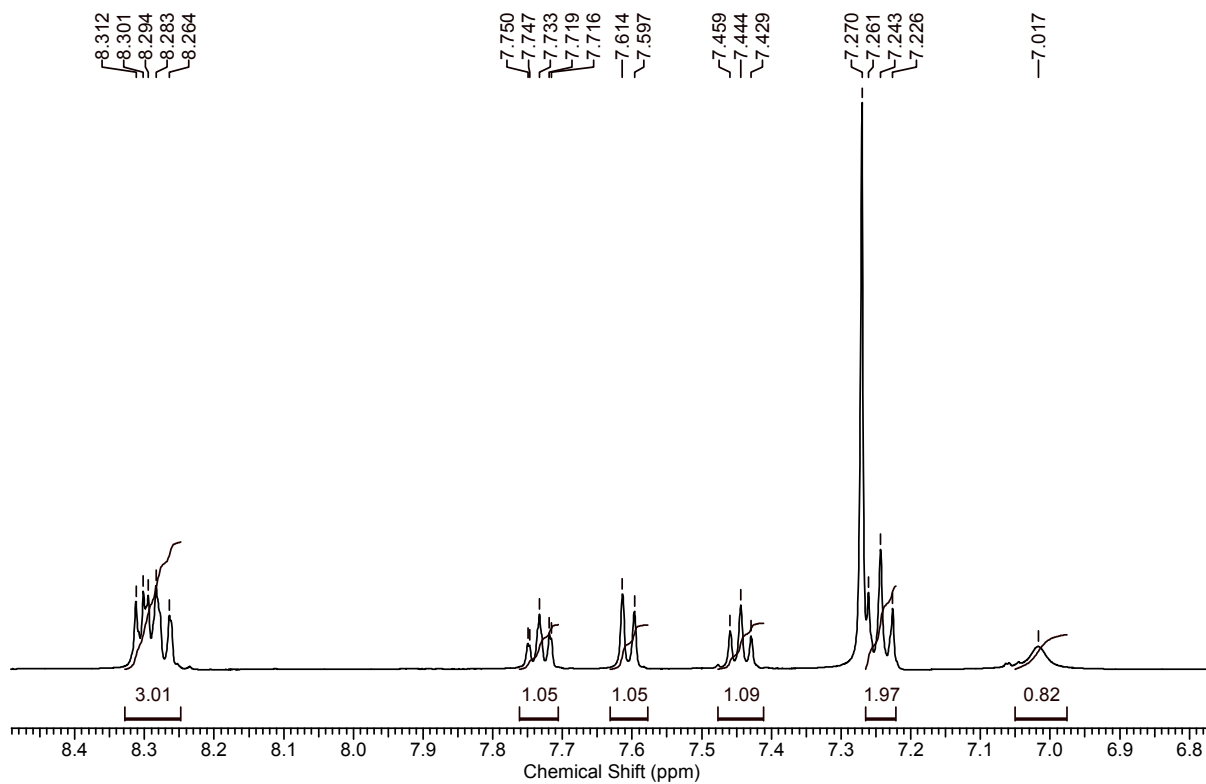

**Fig. S5**  $^1\text{H}$  NMR spectrum of the ligand 4-fluoro-3-hydroxy flavone in  $\text{CDCl}_3$ .

$^1\text{H}$  NMR (500 MHz,  $\text{CDCl}_3$ ): 8.31-8.26(m, 3H), 7.75-7.71(m, 1H), 7.60(d,  $J=8.5$ , 1H), 7.44(t,  $J=7.5$ , 1H), 7.26-7.11(m, 2H), 7.01(s, 1H).

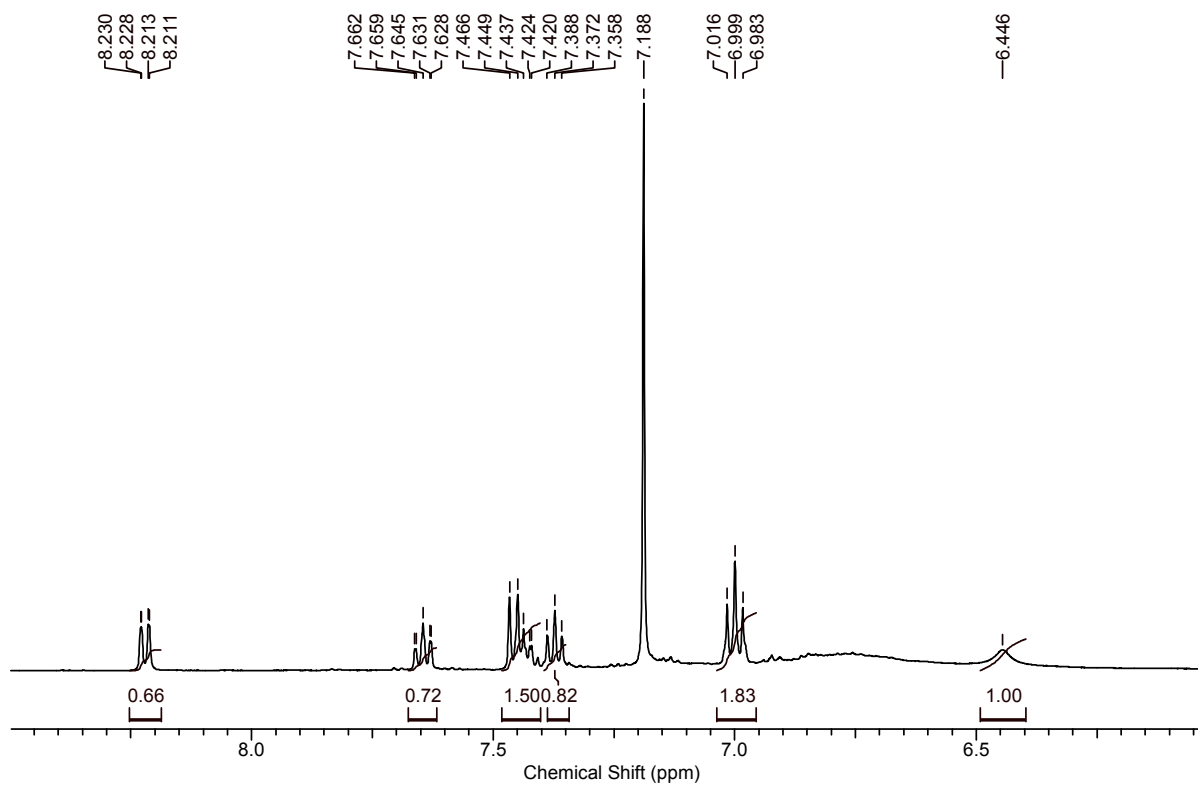

**Fig. S6**  $^1\text{H}$  NMR spectrum of the ligand 2,6-difluoro-3-hydroxy flavone in  $\text{CDCl}_3$ .

$^1\text{H}$  NMR (500 MHz,  $\text{CDCl}_3$ ): 8.23-8.21(m, 1H), 7.66-7.62(m, 1H), 7.46-7.40(m, 2H), 7.37(t,  $J=8$ , 1H), 6.99(t,  $J=8.5$ , 2H), 6.44(s, 1H).

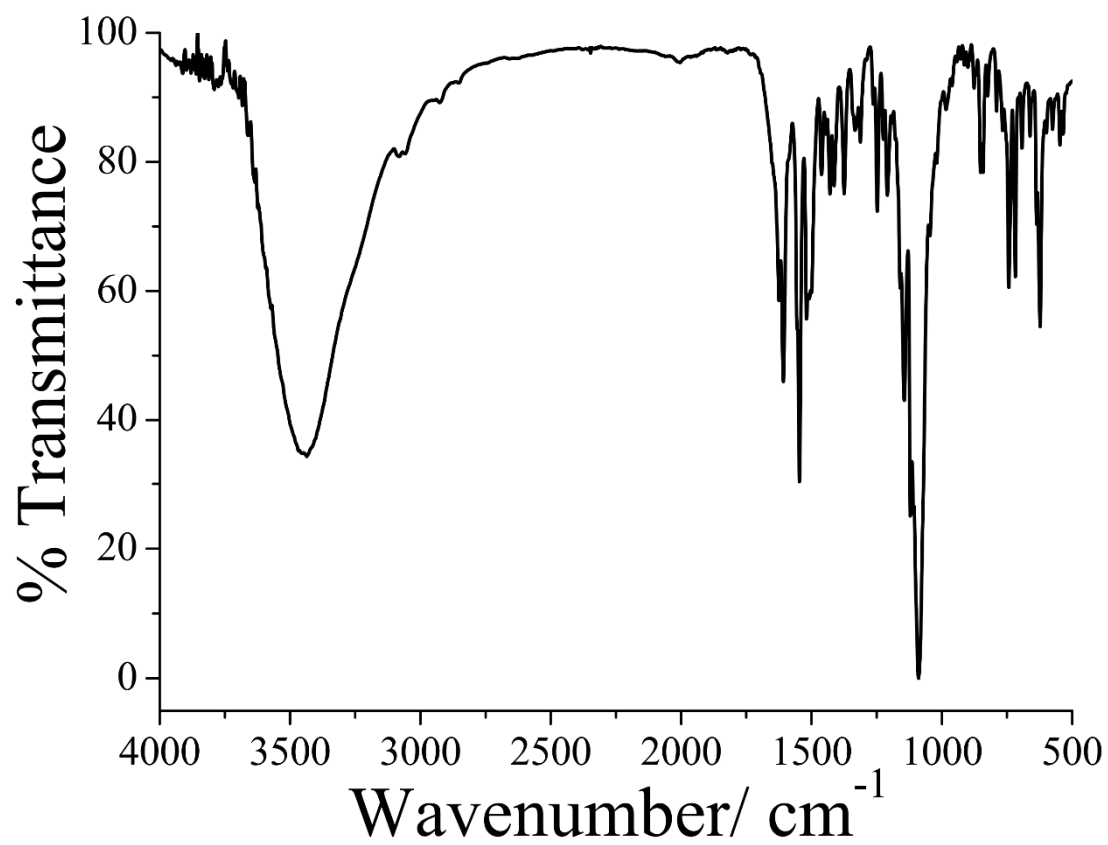

**Fig. S7** IR spectrum of complex **1** in solid KBr matrix.

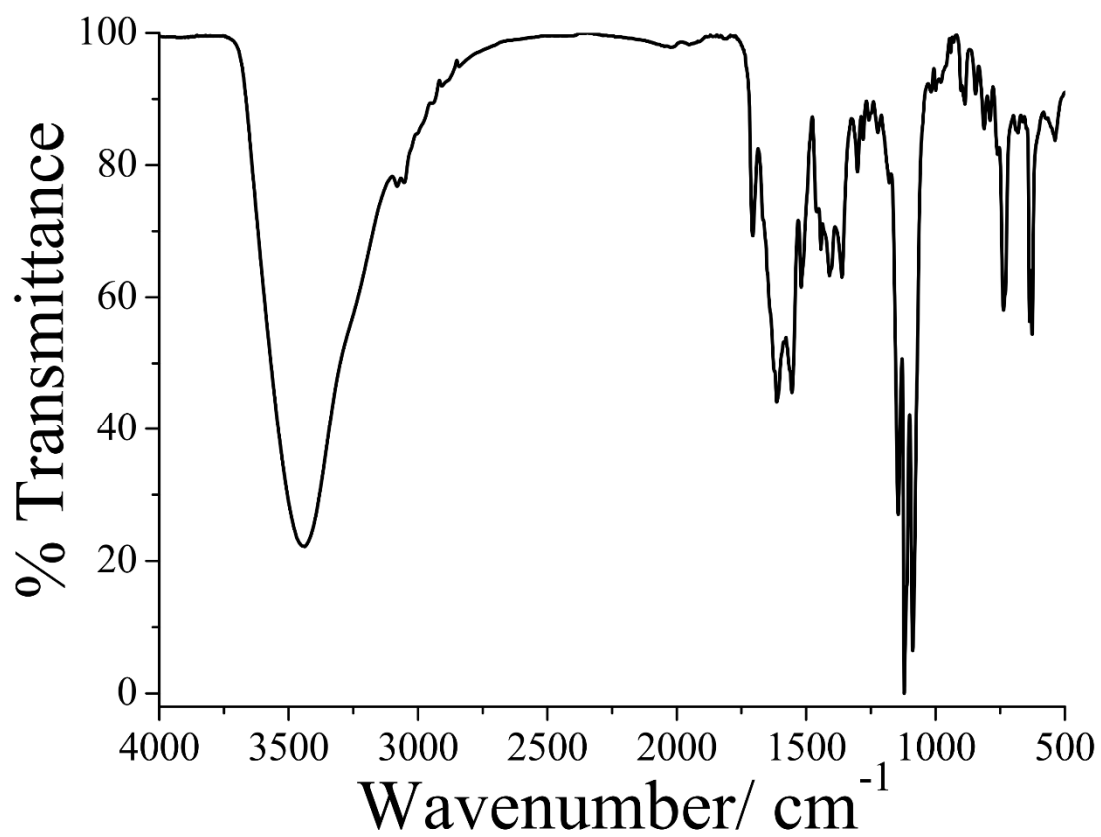

**Fig. S8** IR spectrum of complex **2** in solid KBr matrix.

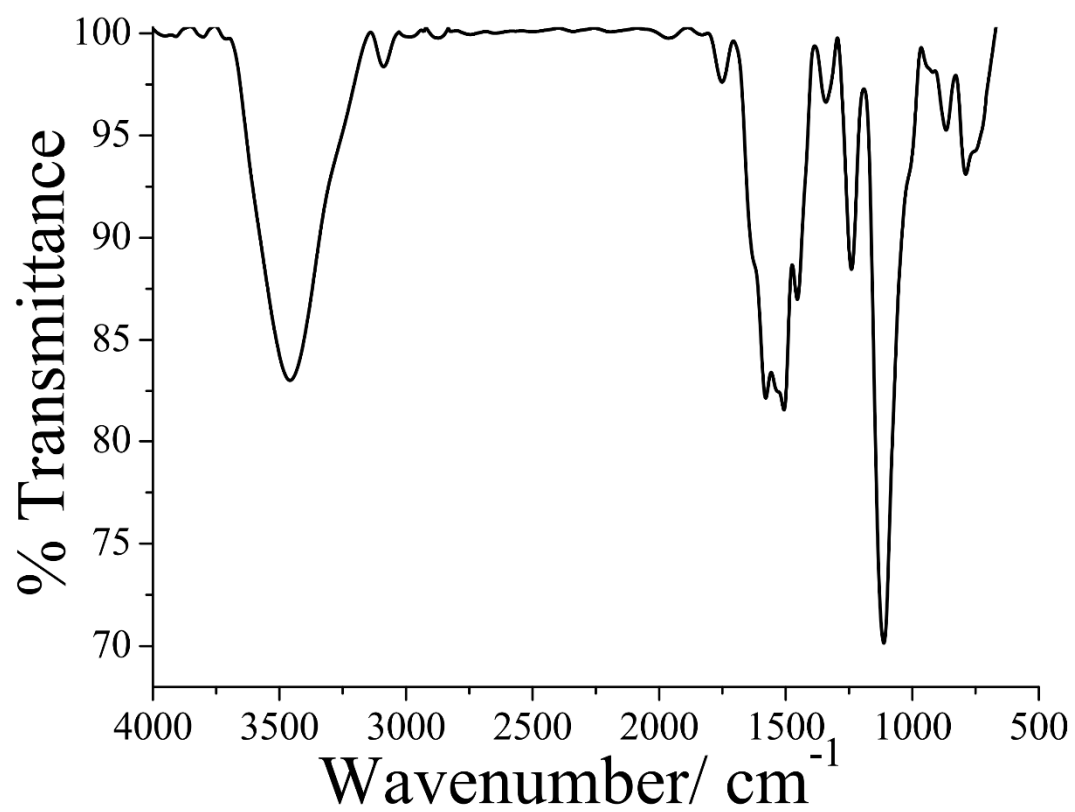

**Fig. S9** IR spectrum of complex **3** in solid KBr matrix.

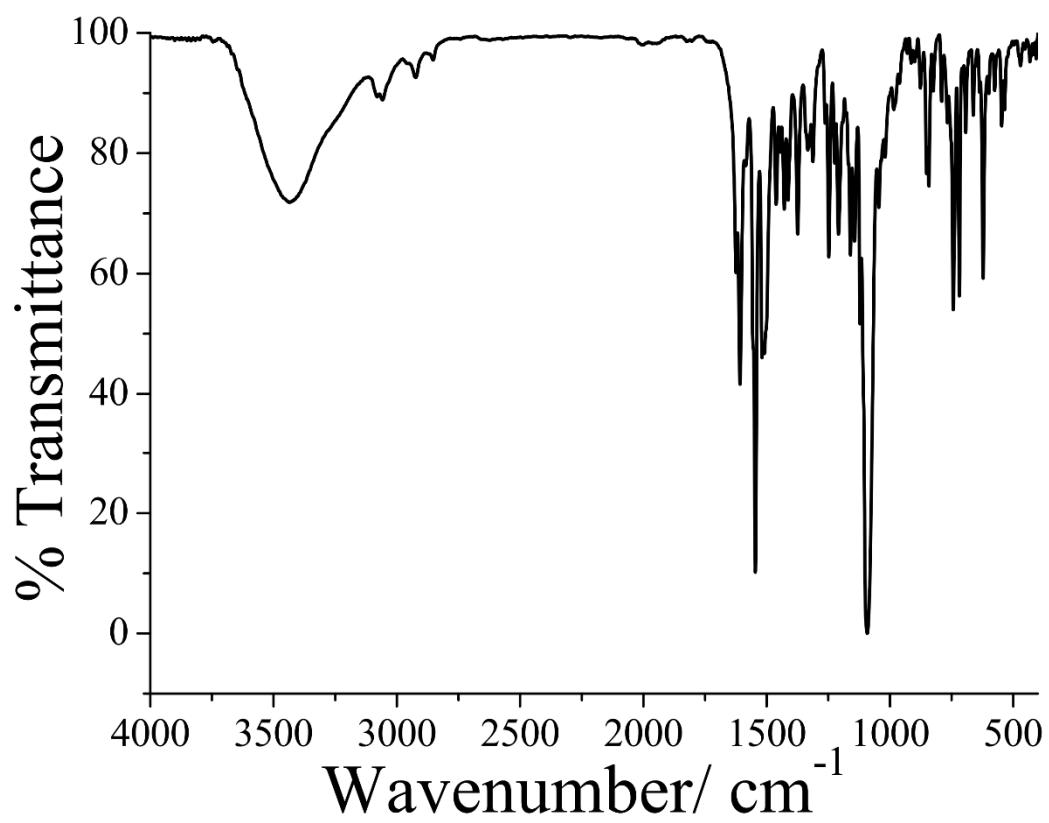

**Fig. S10** IR spectrum of complex 4 in solid KBr matrix.

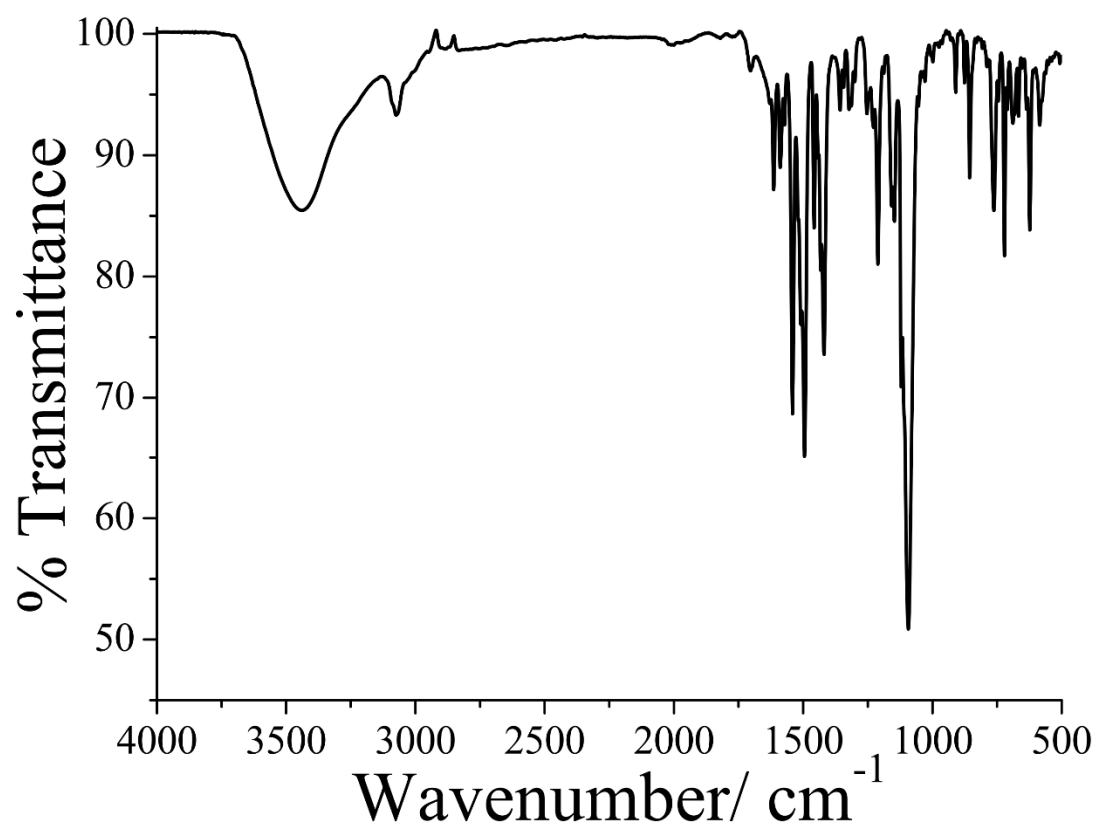

**Fig. S11** IR spectrum of complex **5** in solid KBr matrix.



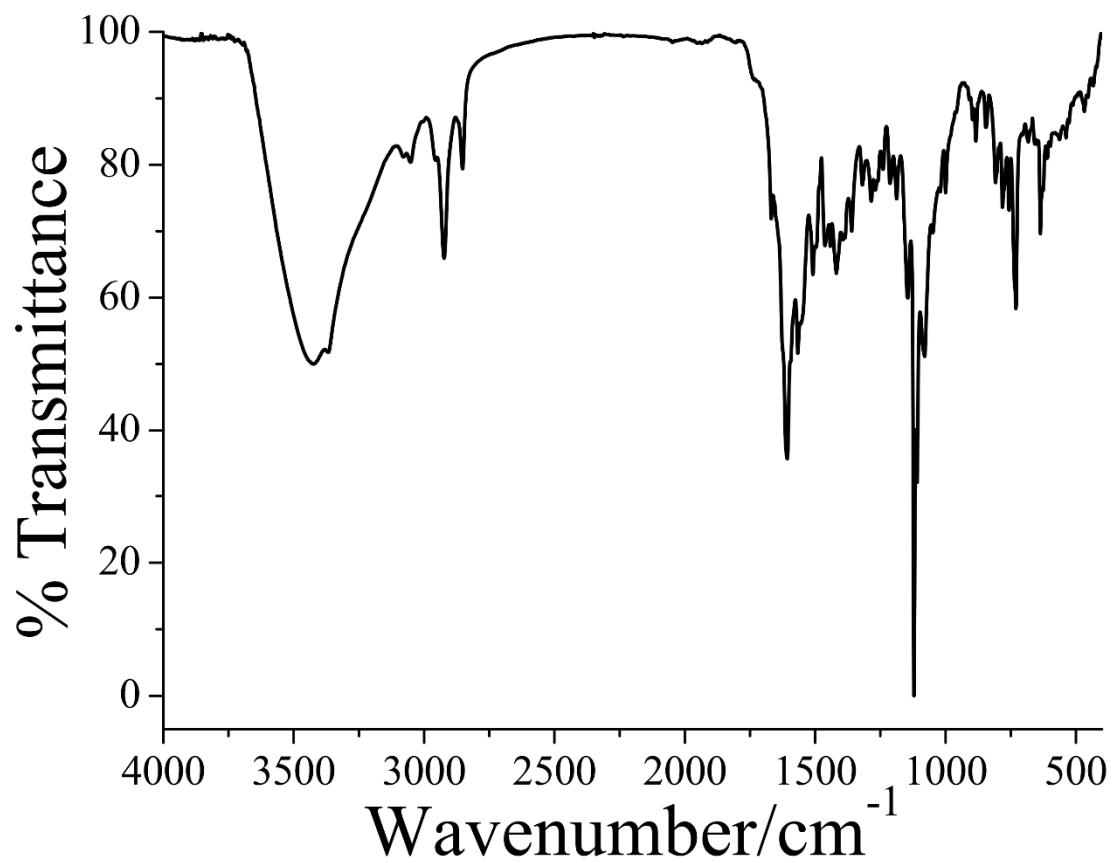

**Fig. S12** IR spectrum of complex **6** in solid KBr matrix.

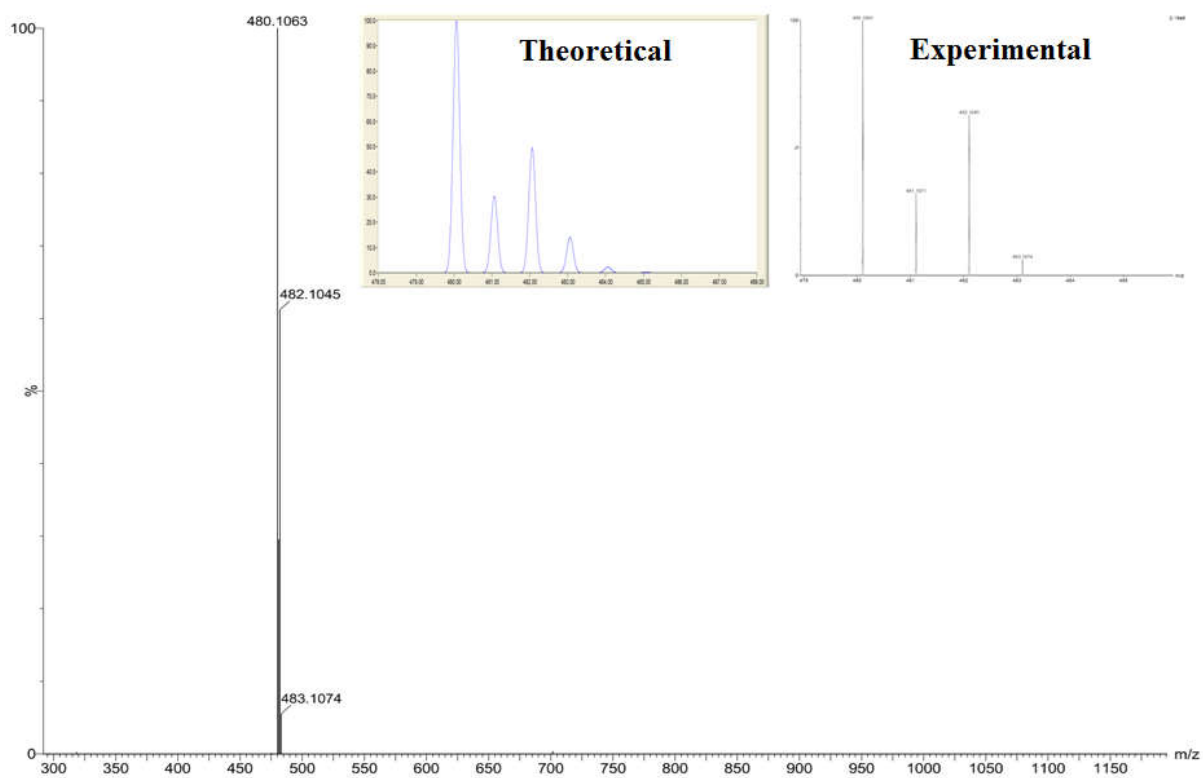

**Fig. S13** ESI Mass spectrum of complex **1** in acetonitrile showing the  $[M-(ClO_4^-)]^+$  peak at  $m/z = 480.1063$ . The inset shows the theoretical and experimental isotopic distributions for the complex.

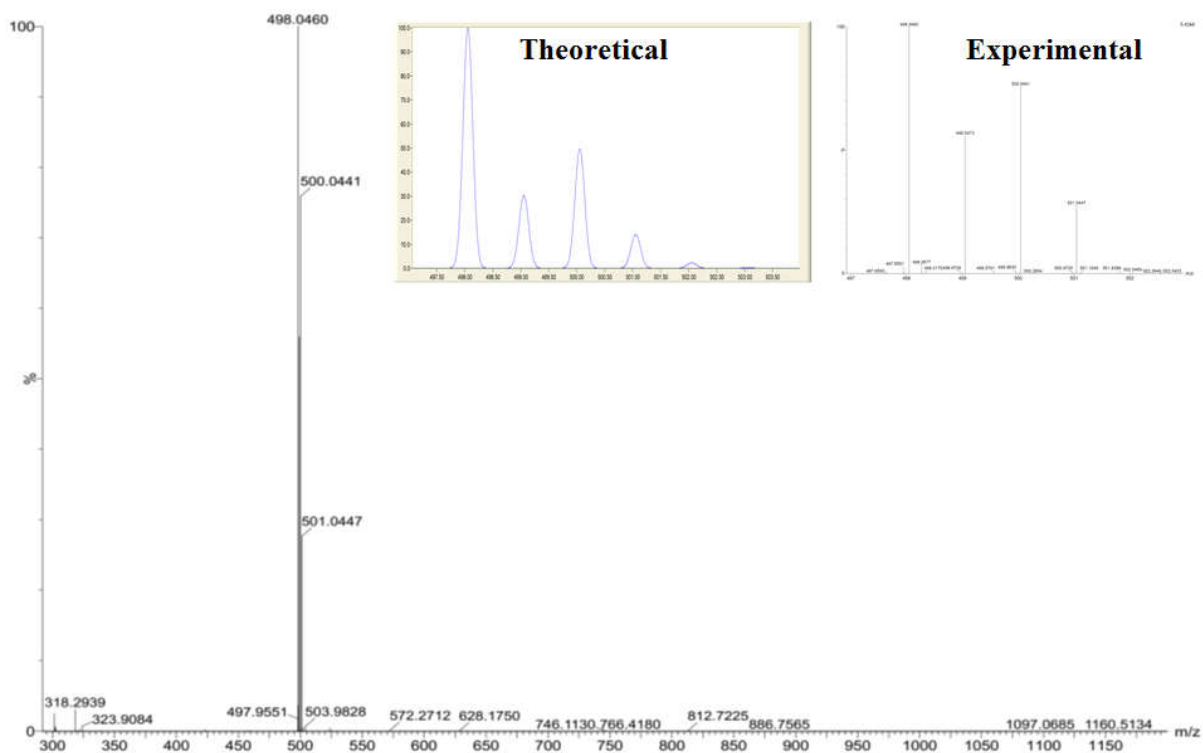

**Fig. S14** ESI Mass spectrum of complex **2** in acetonitrile showing the  $[M-(ClO_4)]^+$  peak at  $m/z = 498.0460$ . The inset shows the theoretical and experimental isotopic distributions for the complex.

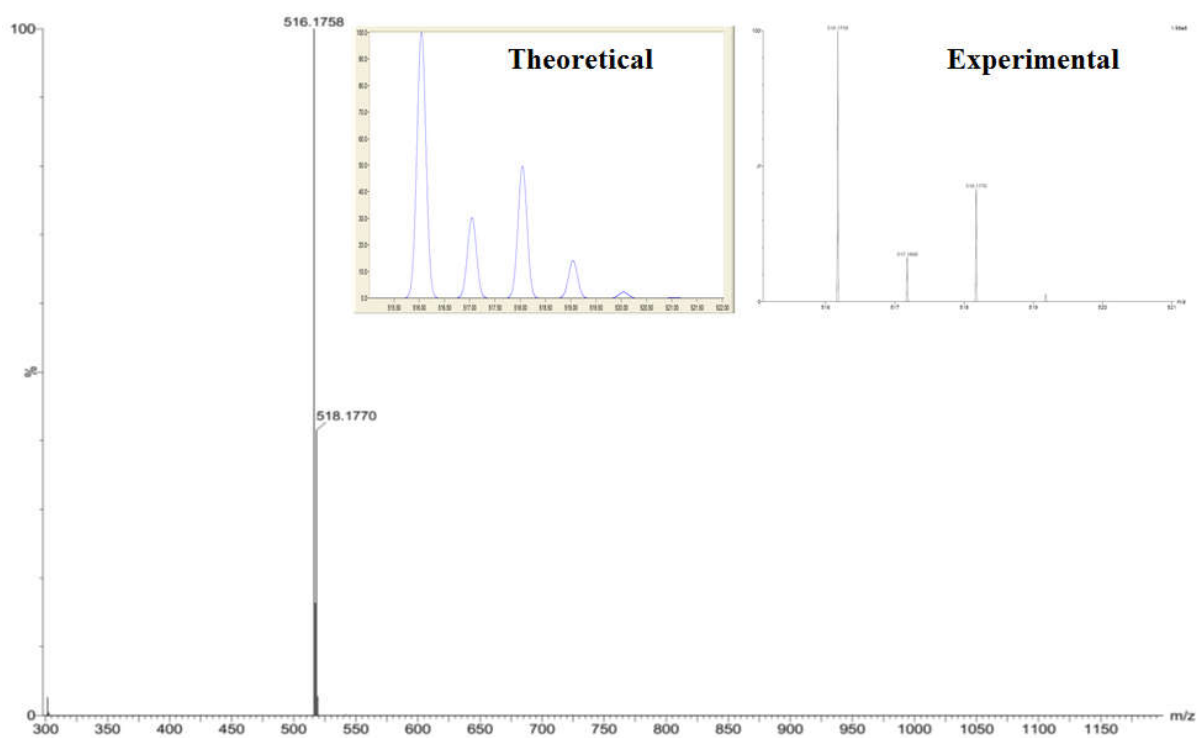

**Fig. S15** ESI Mass spectrum of complex **3** in acetonitrile showing the  $[M-(ClO_4)]^+$  peak at  $m/z = 516.1758$ . The inset shows the theoretical and experimental isotopic distributions for the complex.

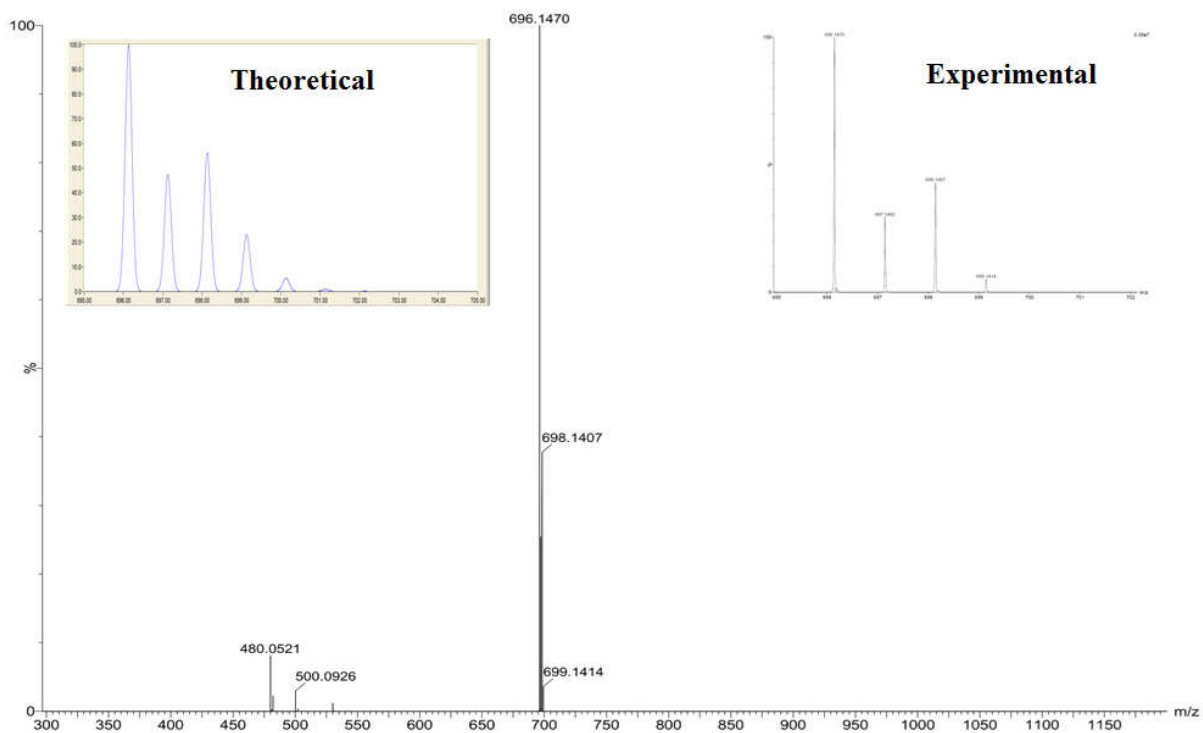

**Fig. S16** ESI Mass spectrum of complex **4** in acetonitrile showing the  $[M-(ClO_4)]^+$  peak at  $m/z = 696.1470$ . The inset shows the theoretical and experimental isotopic distributions for the complex.

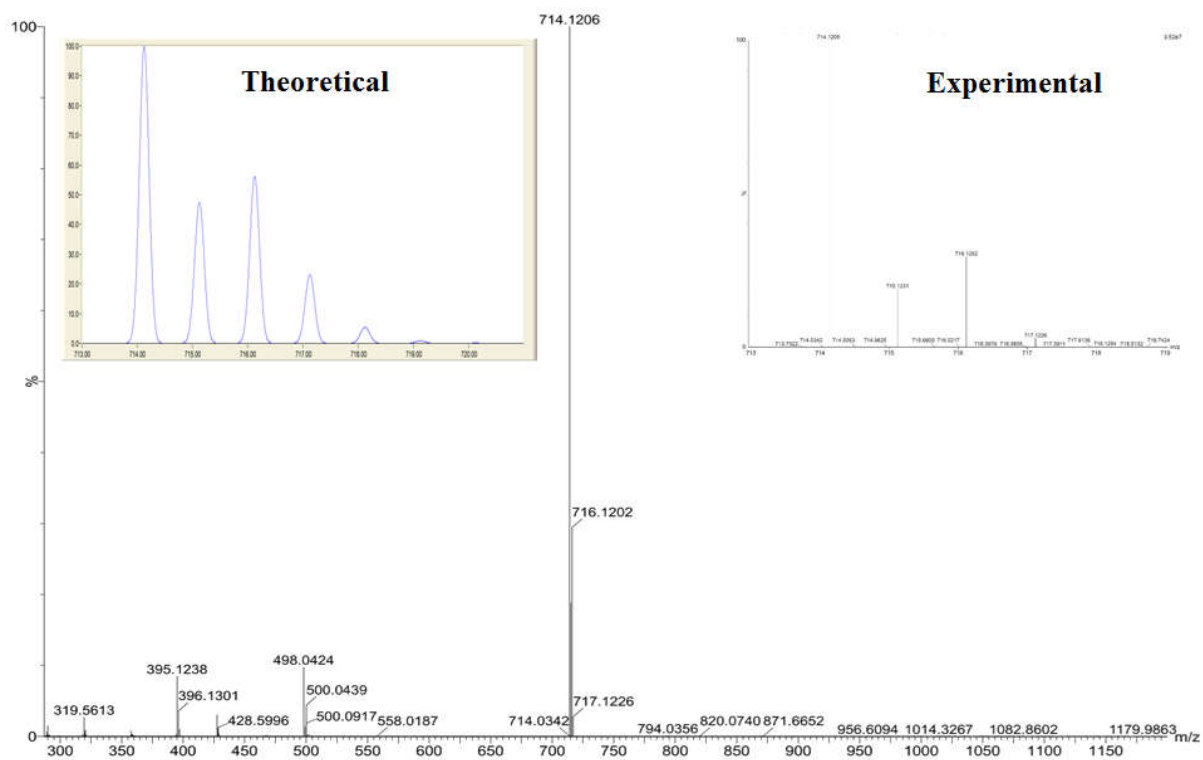

**Fig. S17** ESI Mass spectrum of complex **5** in acetonitrile showing the  $[M-(ClO_4)]^+$  peak at  $m/z = 714.1206$ . The inset shows the theoretical and experimental isotopic distributions for the complex.

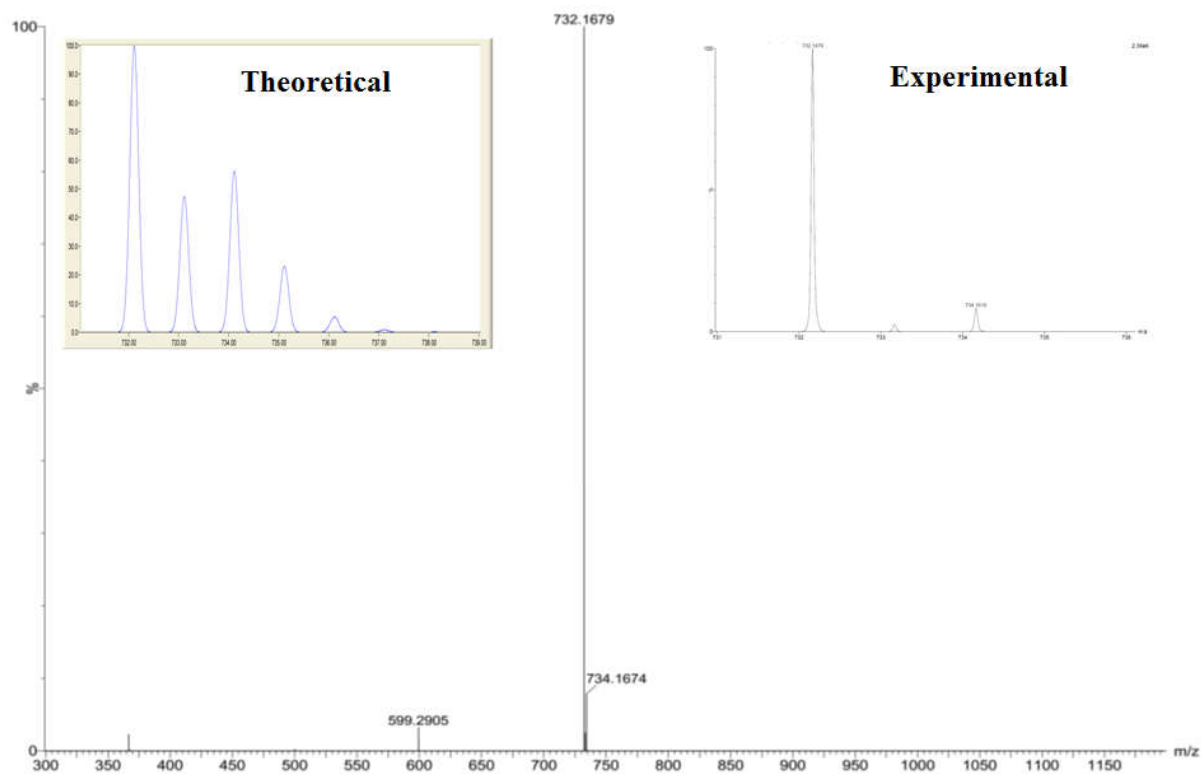

**Fig. S18** ESI Mass spectrum of complex **6** in acetonitrile showing the  $[M-(ClO_4)]^+$  peak at  $m/z = 732.1679$ . The inset shows the theoretical and experimental isotopic distributions for the complex.

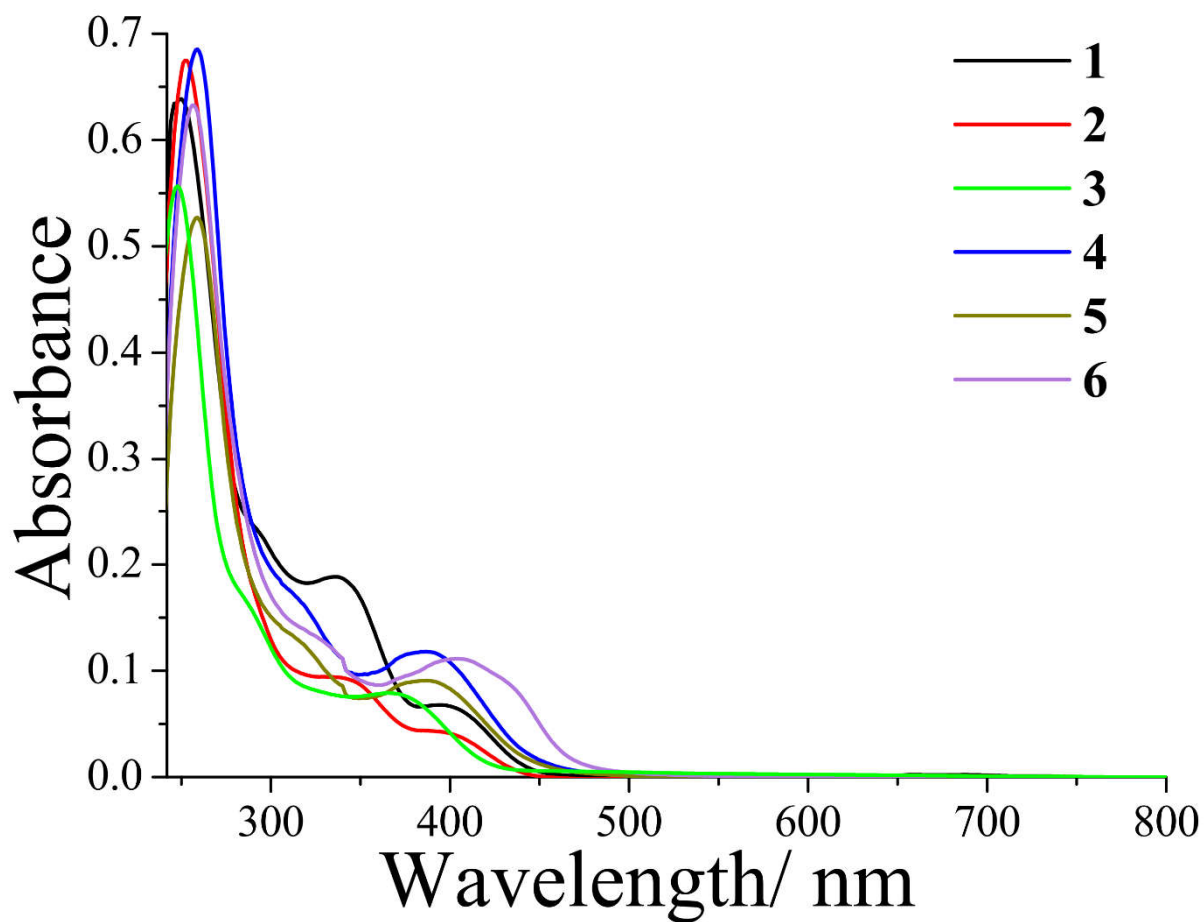

**Fig. S19** UV-visible spectra of **1-6** (25  $\mu$ M) in DMSO-DMEM (1:9 v/v) showing the ligand-centered bands.



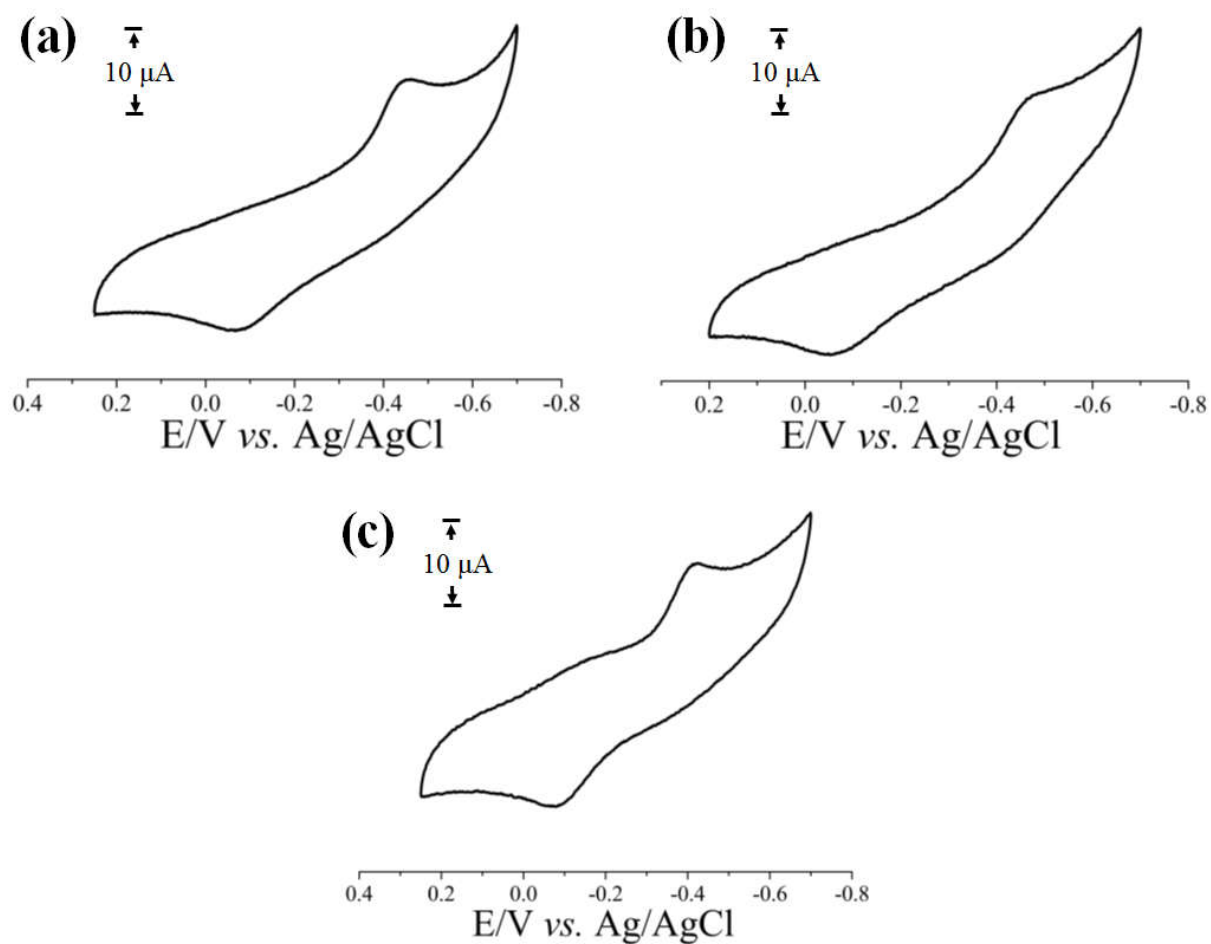

**Fig. S20** Cyclic voltammetric responses of the complexes **1-3** in DMF at a scan rate of 50 mVs<sup>-1</sup> using TBAP (0.1 M) as the supporting electrolyte.

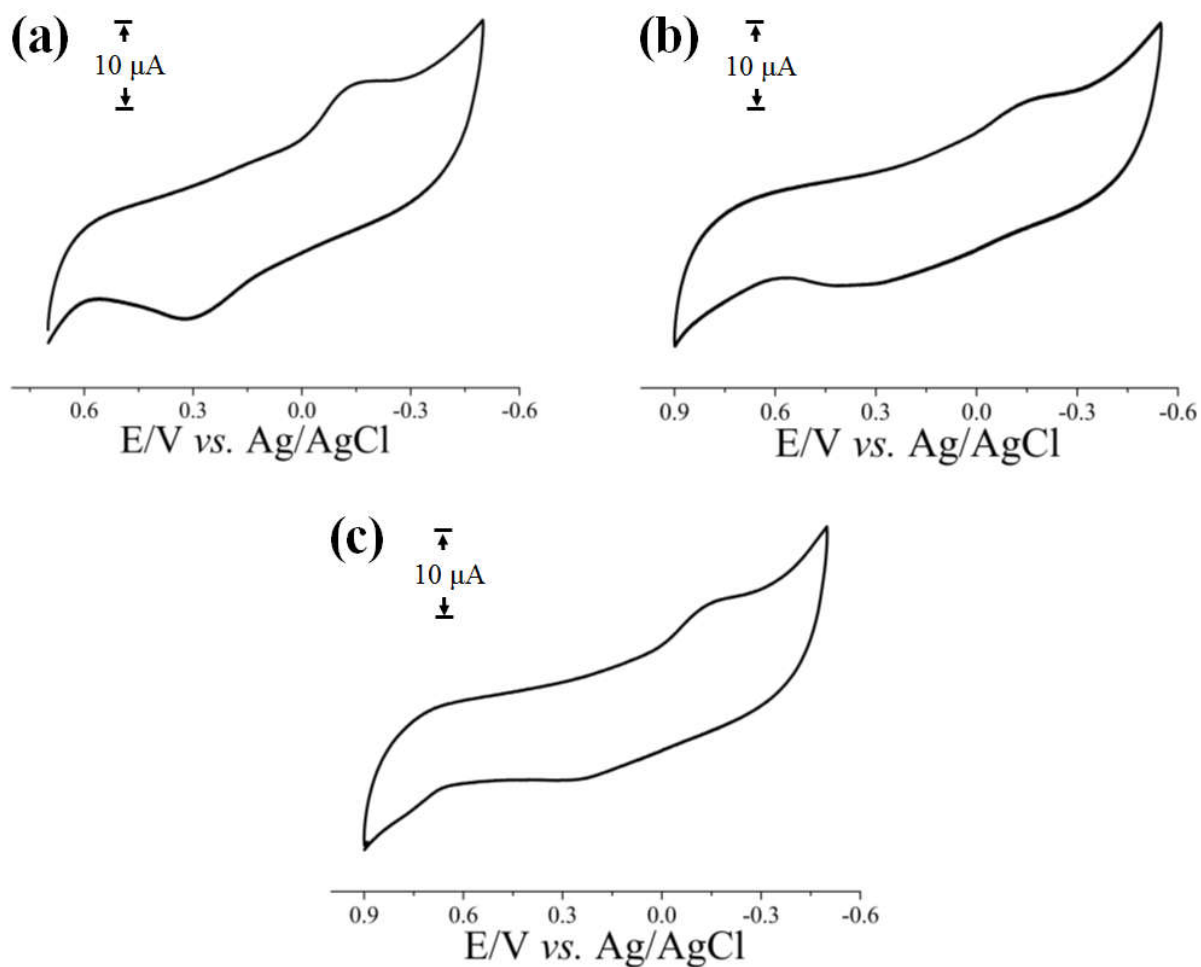

**Fig. S21** Cyclic voltammetric responses of the complexes 4-6 in DMF at a scan rate of  $50 \text{ mVs}^{-1}$  using TBAP (0.1 M) as the supporting electrolyte.

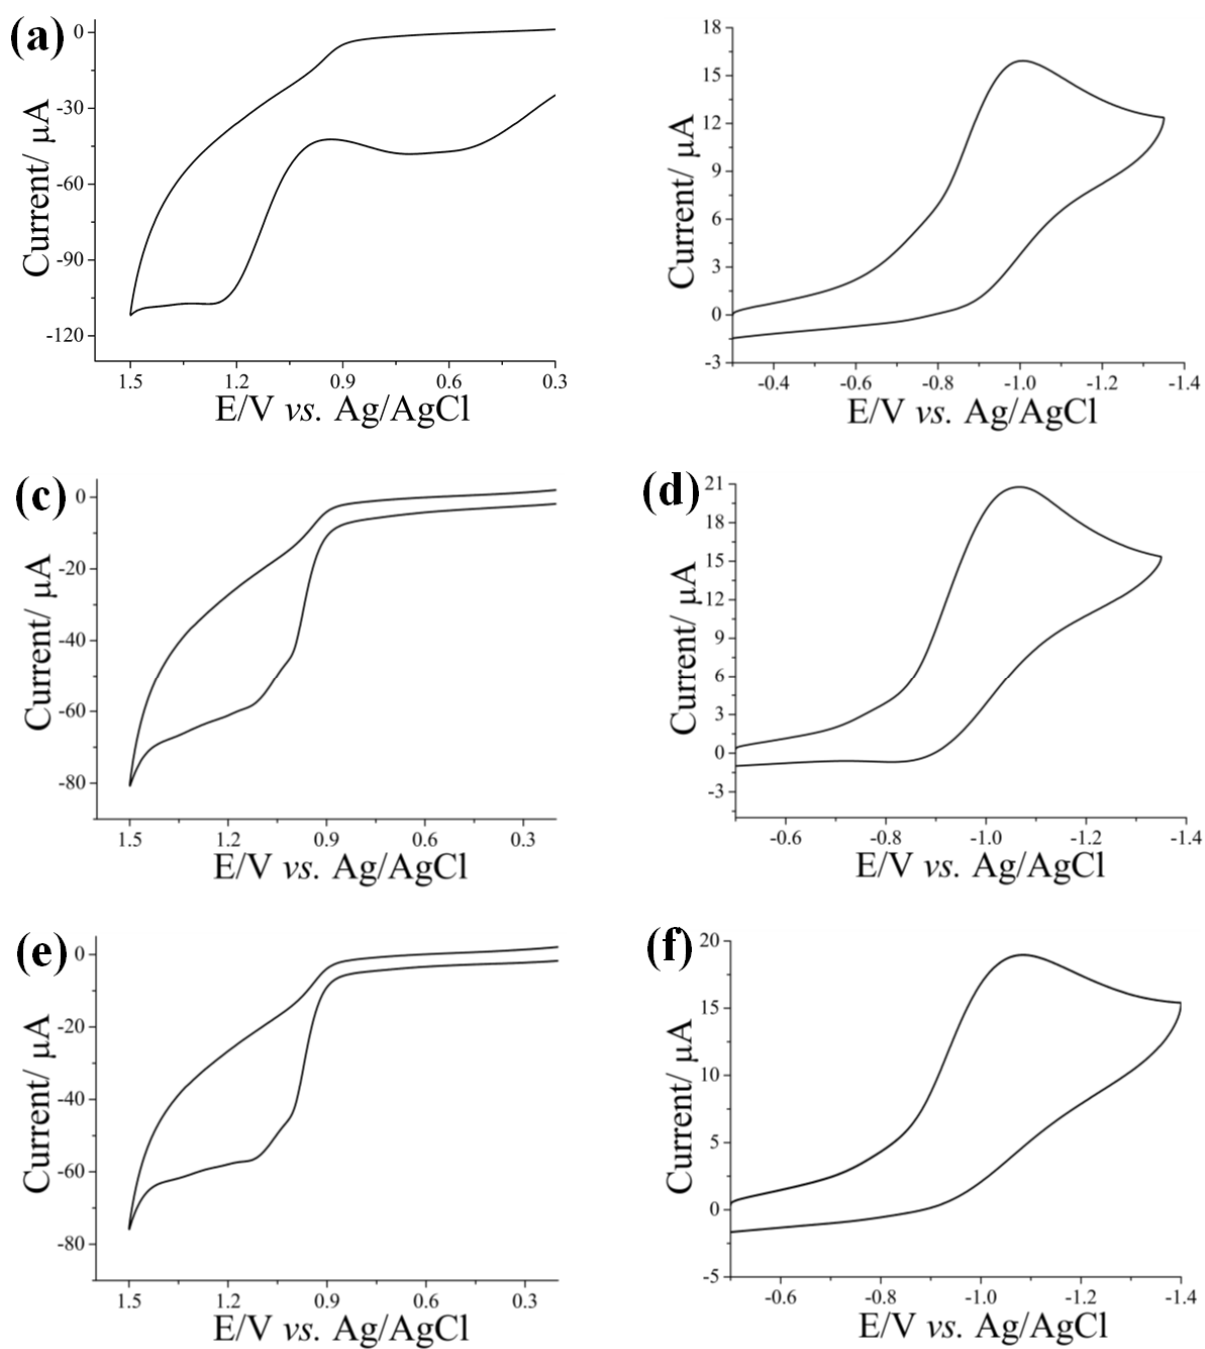

**Fig. S22** Cyclic voltammetric responses of the complexes **1** (a & b), **2** (c & d) and **3** (e & f) showing the anodic and cathodic responses corresponding to the flavonoids and phenanthroline bases present in the complexes in DMF at a scan rate of 50 mVs<sup>-1</sup> using TBAP (0.1 M) as the supporting electrolyte.

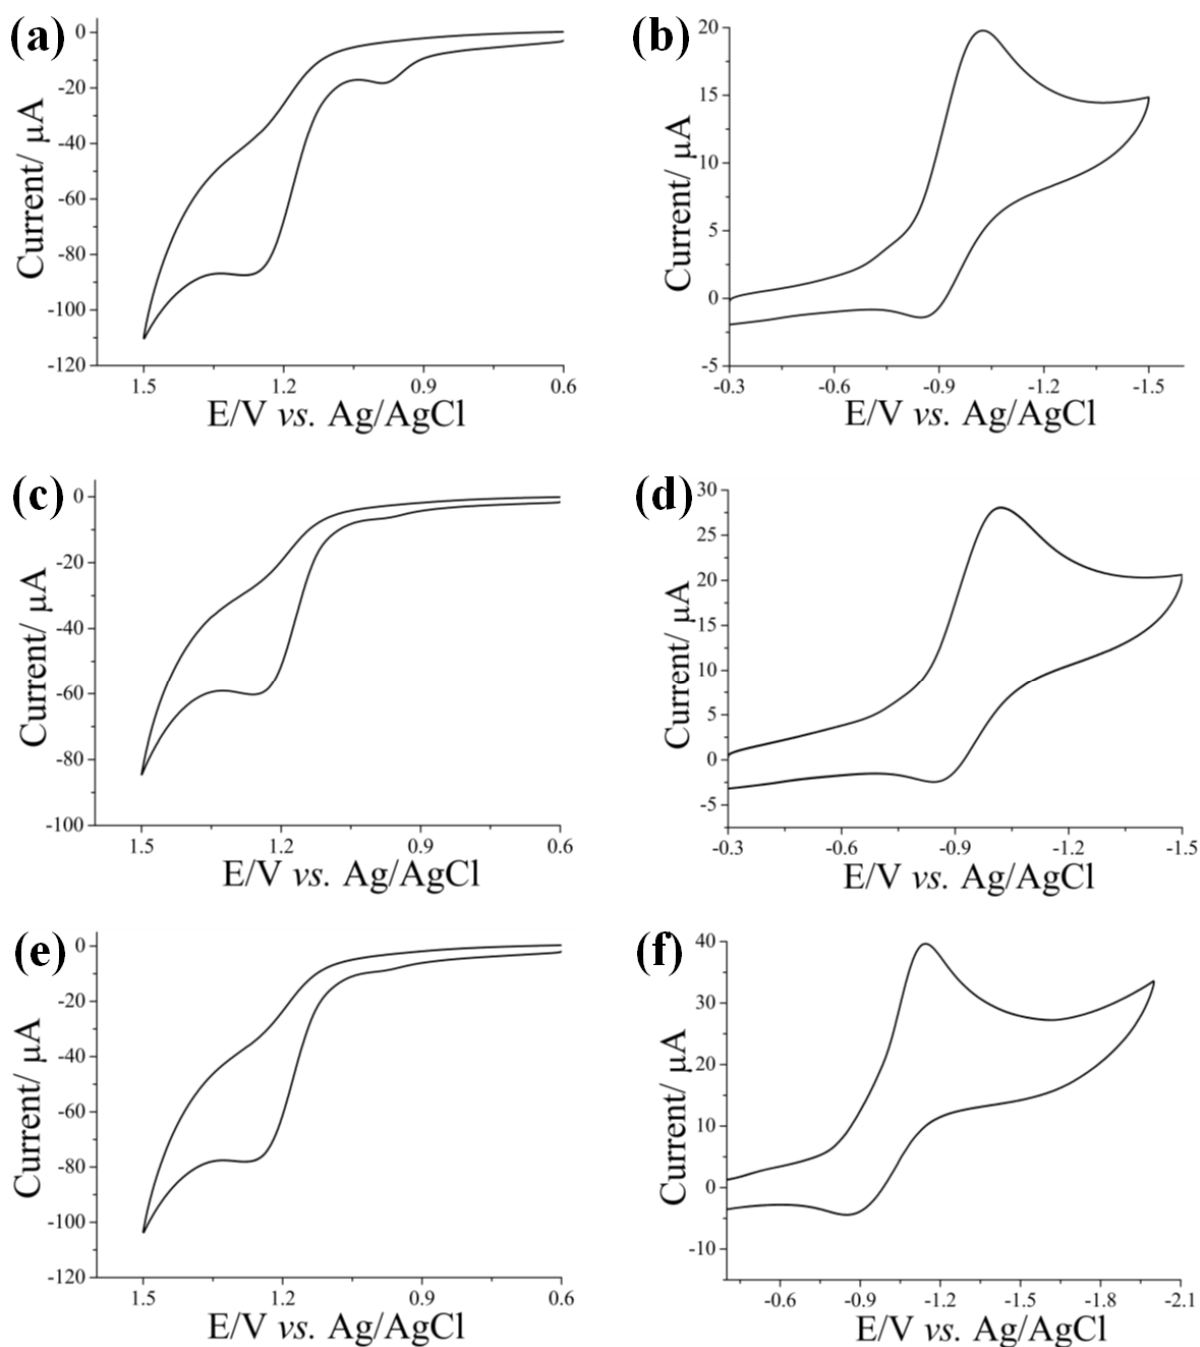

**Fig. S23** Cyclic voltammetric responses of the complexes **4** (a & b), **5** (c & d) and **6** (e & f) showing the anodic and cathodic responses corresponding to the flavonoids and phenanthroline bases present in the complexes in DMF at a scan rate of  $50 \text{ mVs}^{-1}$  using TBAP (0.1 M) as the supporting electrolyte.

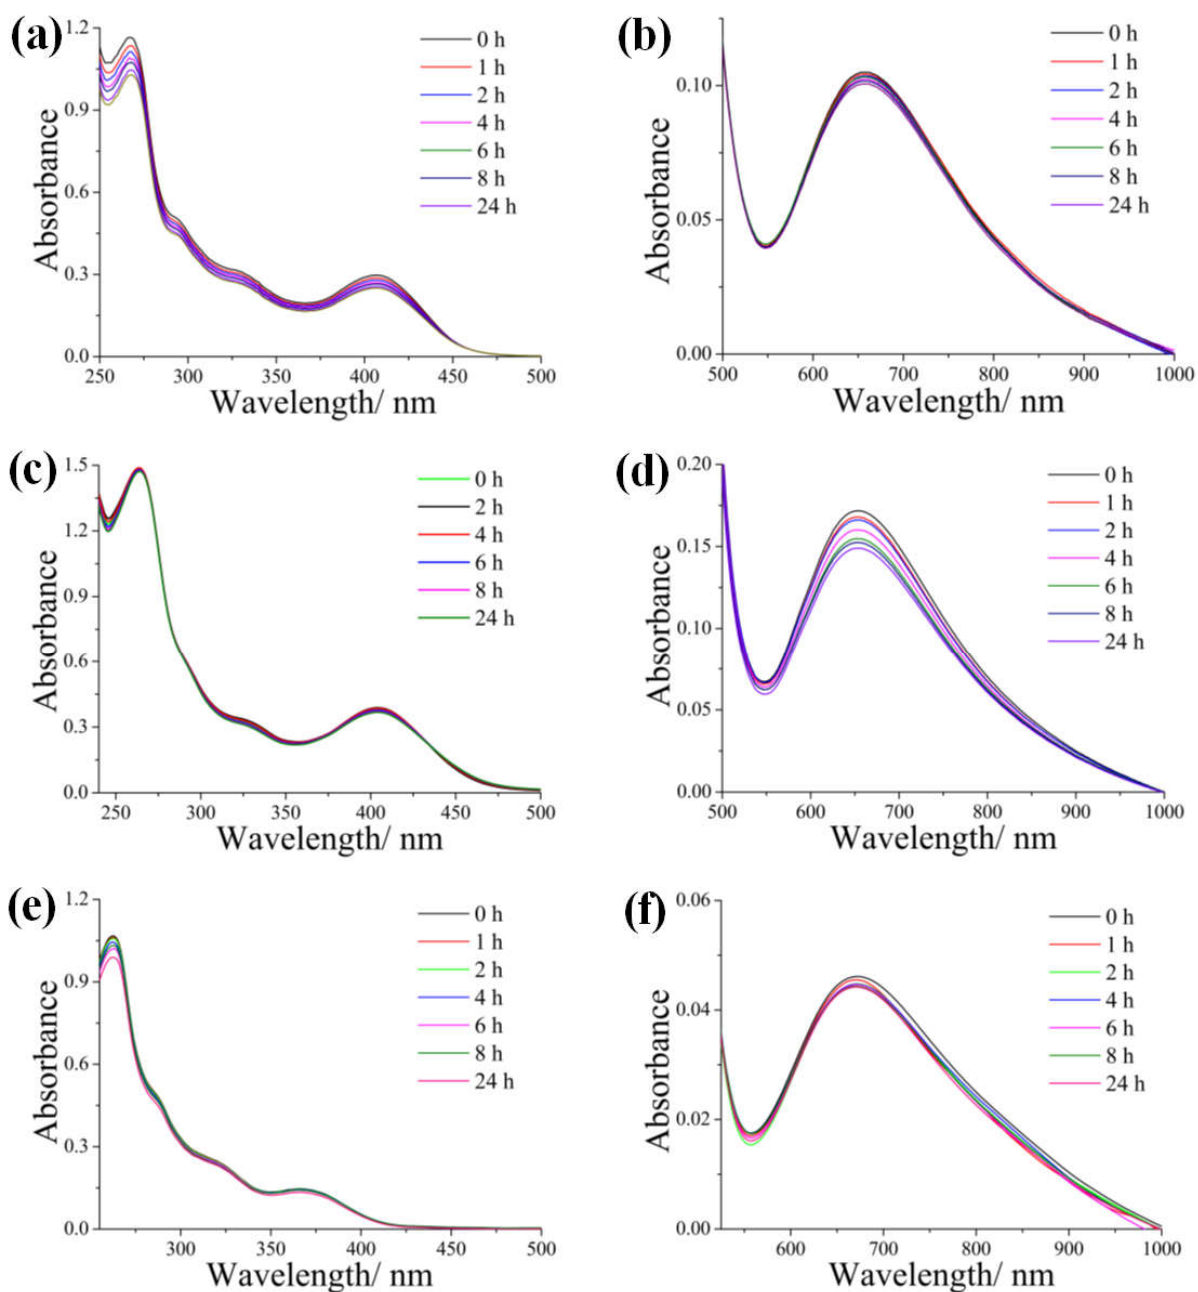

**Fig. S24** UV-visible spectra of the complexes **1** (a & b), **2** (c & d) and **3** (e & f) recorded in DMSO-Tris-HCl buffer (1:9, pH 7.2) for a period of 24 h.

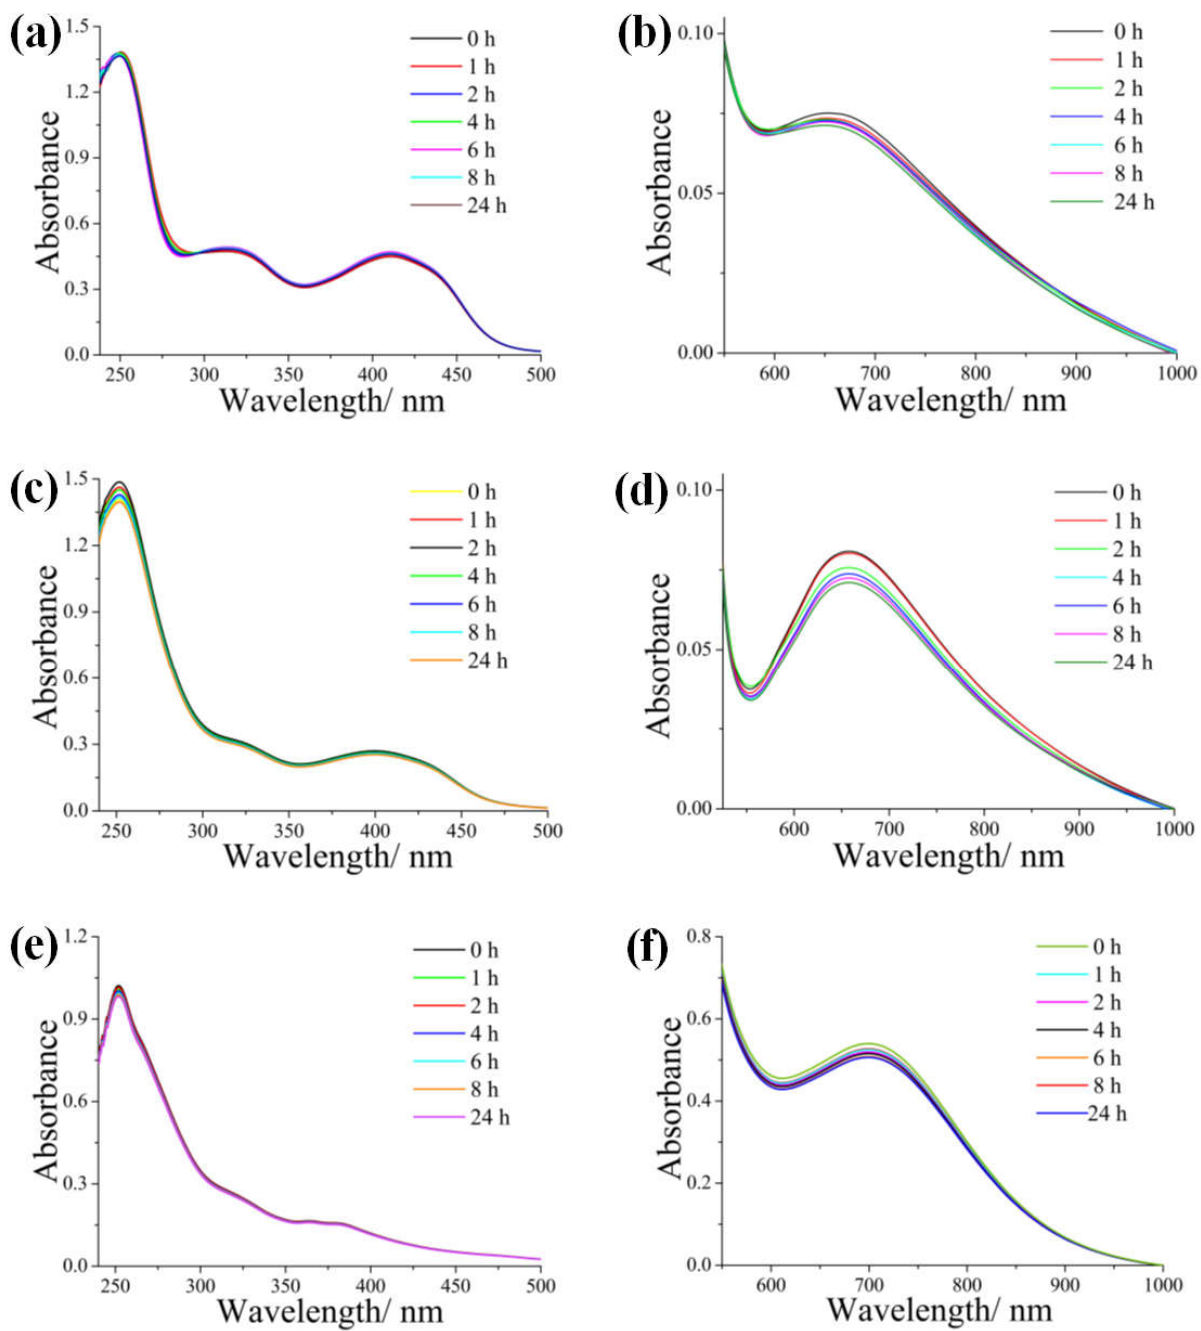

**Fig. S25** UV-visible spectra of the complexes **4** (a & b), **5** (c & d) and **6** (e & f) recorded in DMSO-Tris-HCl buffer (1:9, pH 7.2) for a period of 24 h.

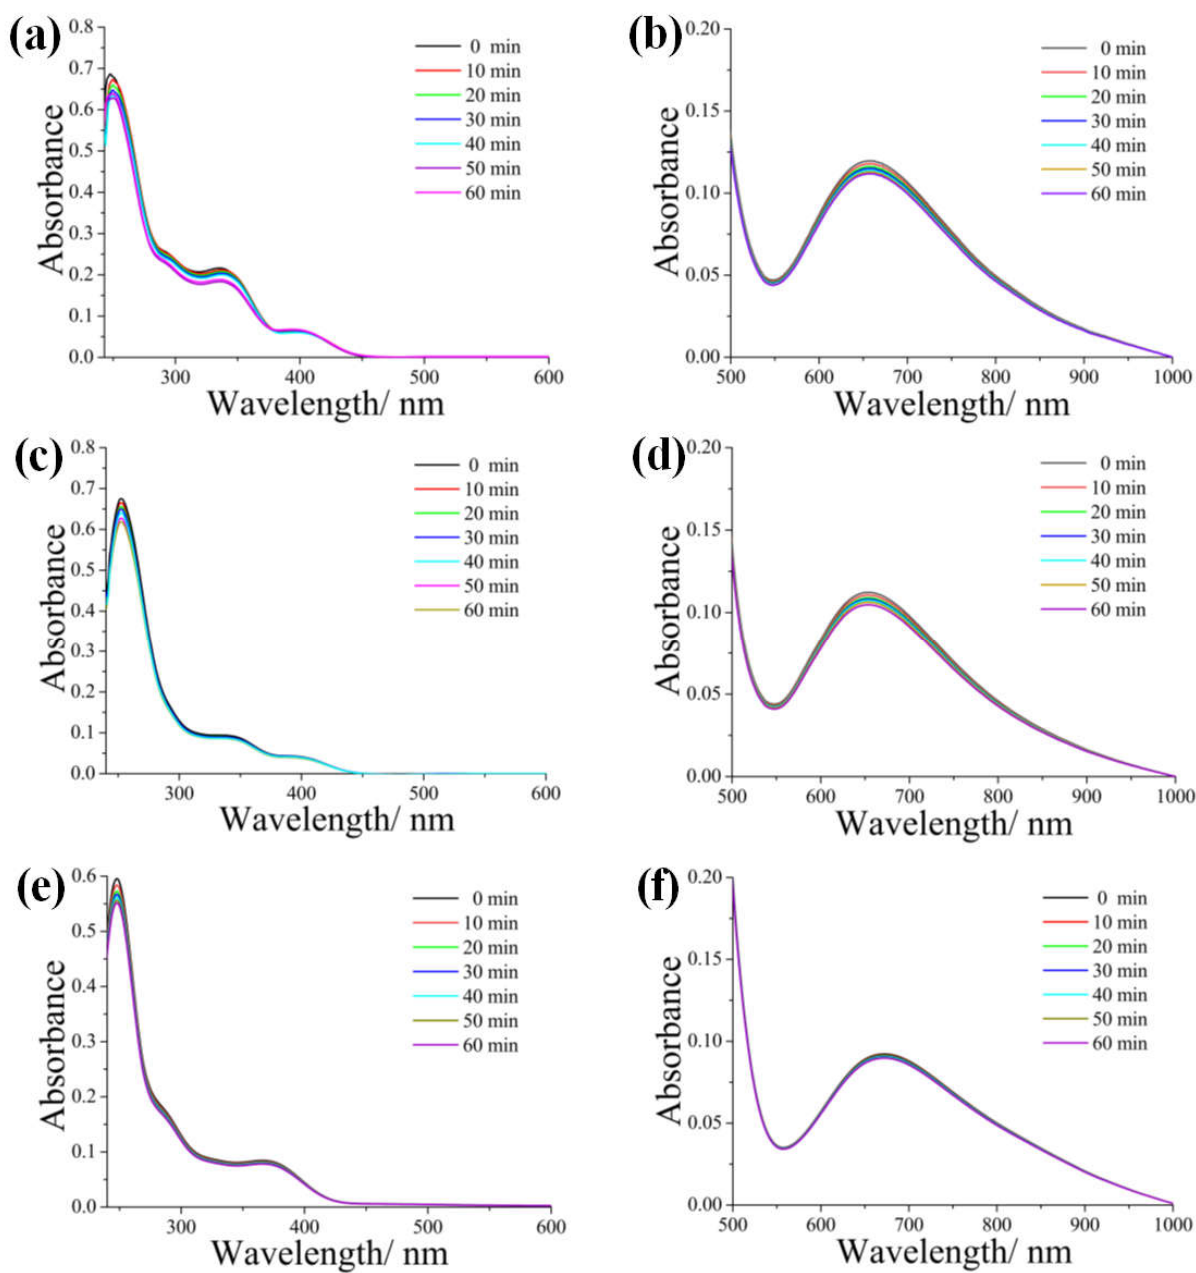

**Fig. S26** UV-visible spectra of the complexes **1** (a & b), **2** (c & d) and **3** (e & f) recorded in DMSO-DMEM (1:9 v/v) showing their photostability on exposure to visible light for a period of 60 min.

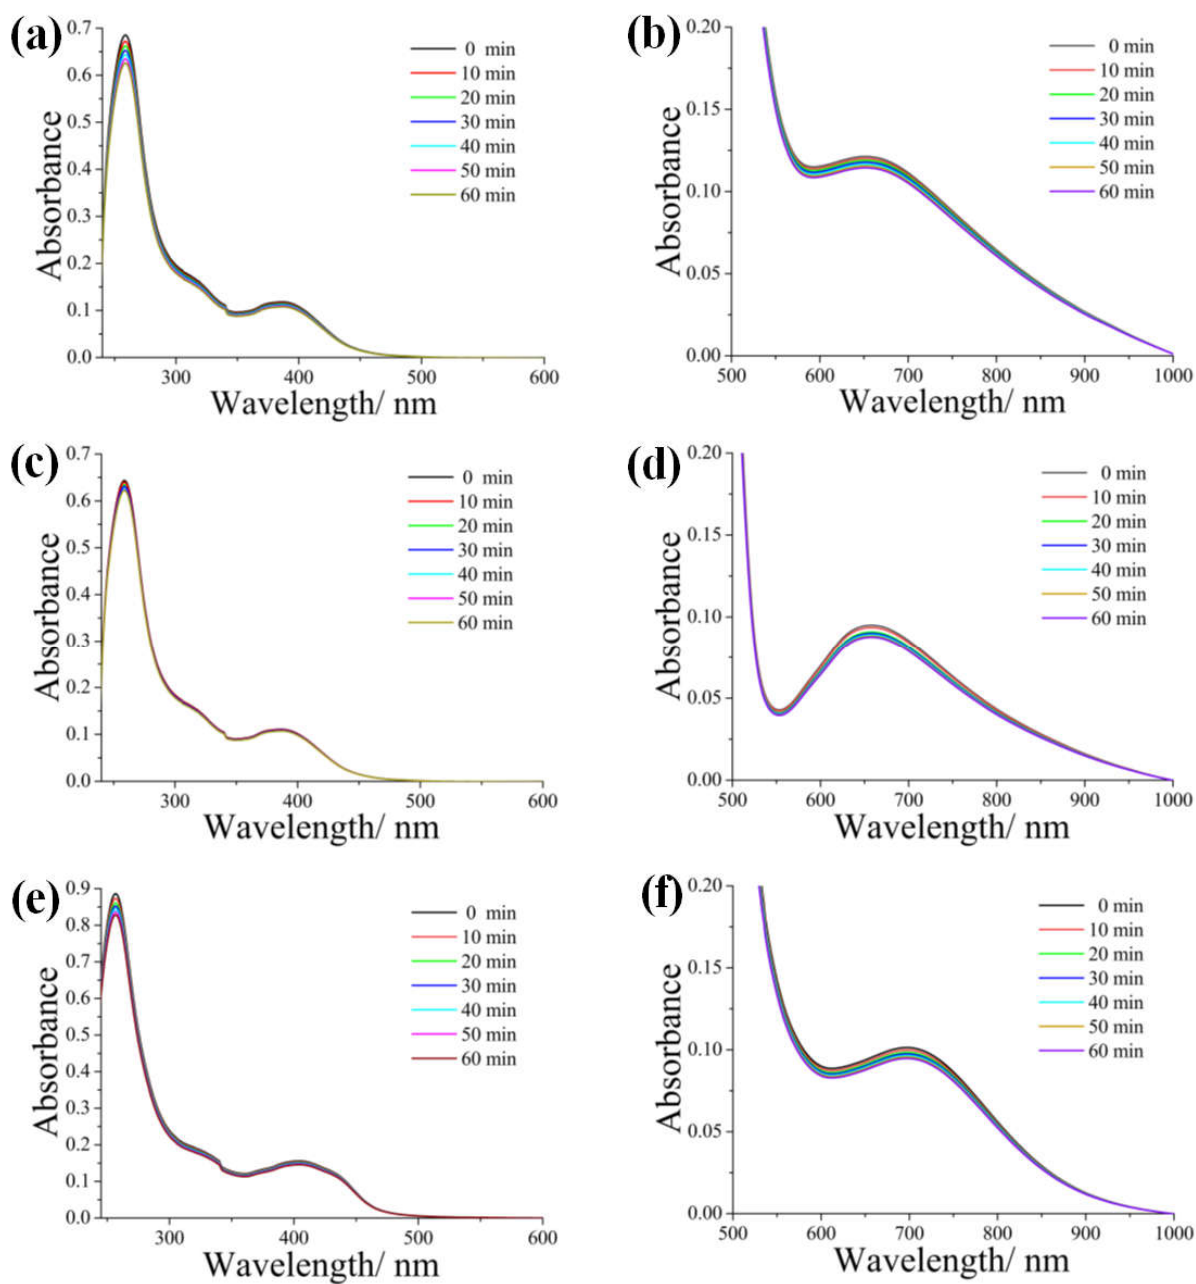

**Fig. S27** UV-visible spectra of the complexes **4** (a & b), **5** (c & d) and **6** (e & f) recorded in DMSO-DMEM (1:9 v/v) showing their photostability on exposure to visible light for a period of 60 min.



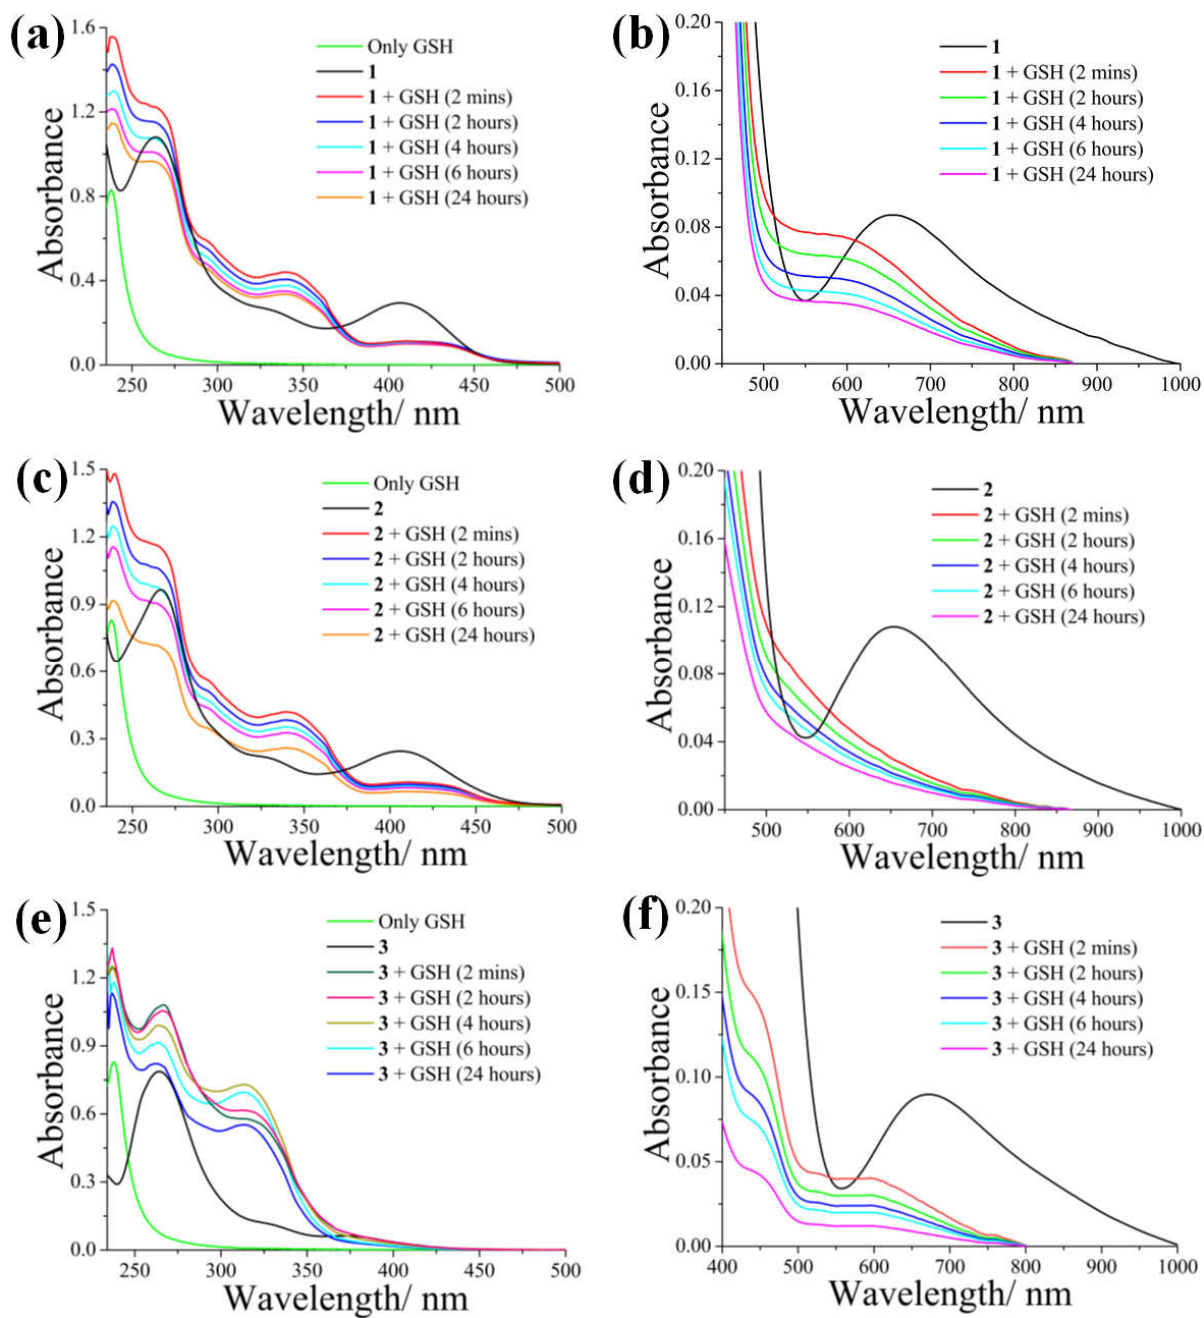

**Fig. S28** UV-visible spectral changes of the complexes **1** (a & b), **2** (c & d) and **3** (e & f) recorded in DMSO-DMEM (1:9 v/v) for a period of 24 h upon treatment with GSH (3 mM).

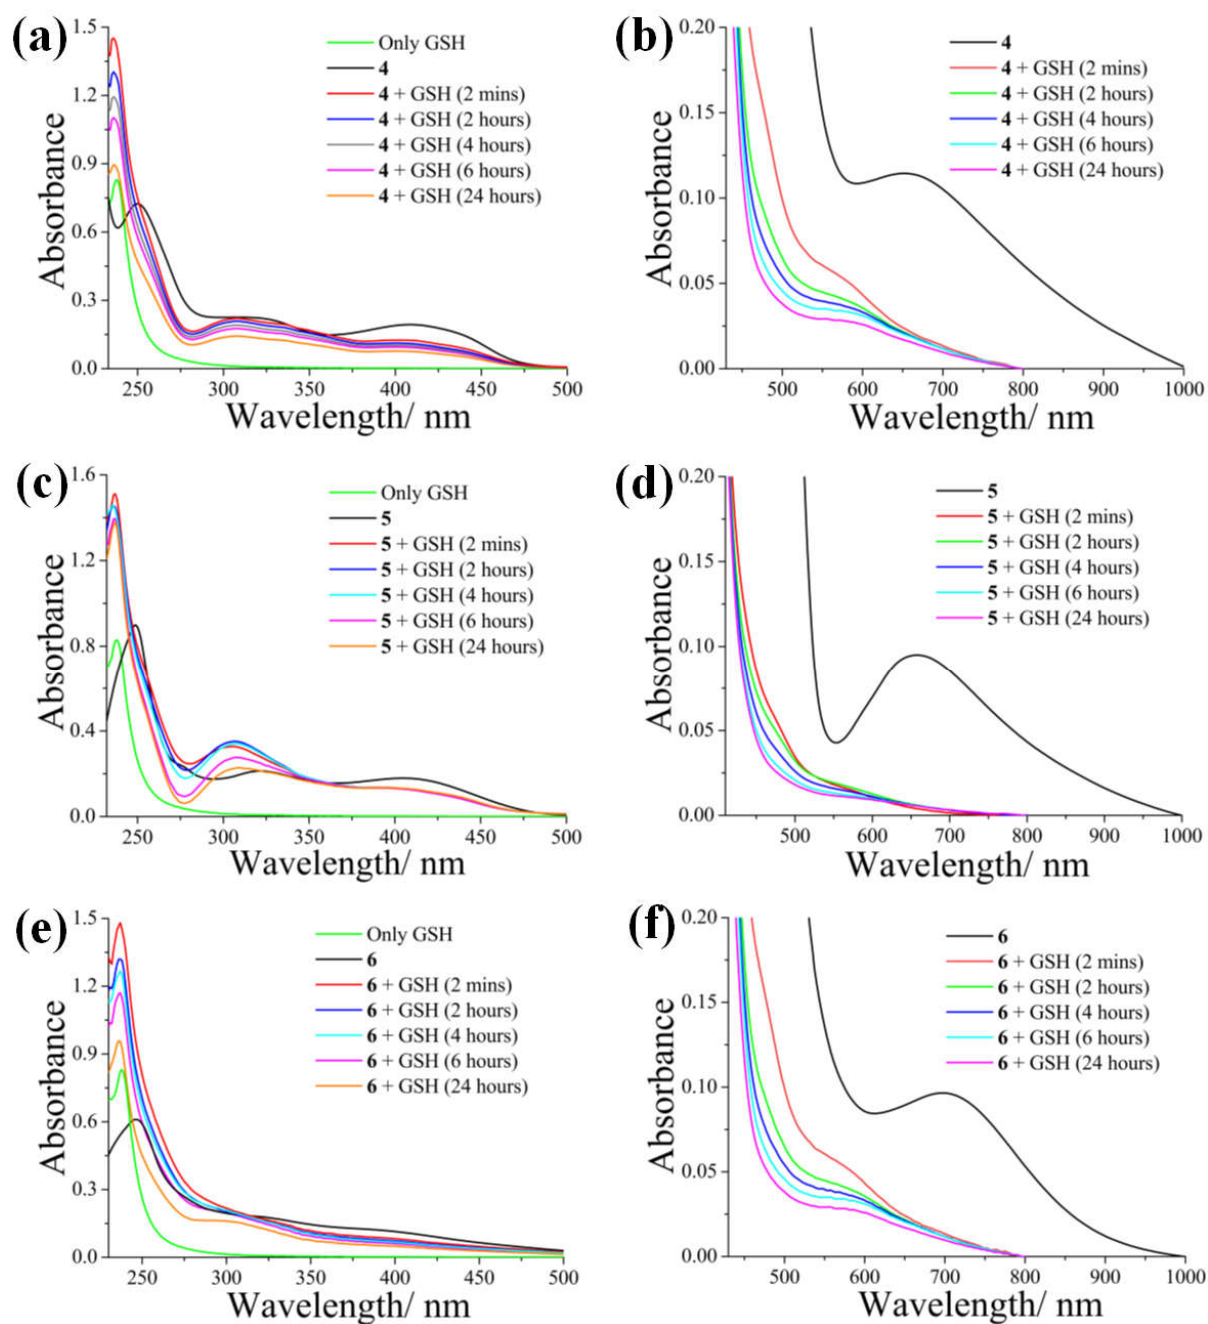

**Fig. S29** UV-visible spectral changes of the complexes **4** (a & b), **5** (c & d) and **6** (e & f) recorded in DMSO-DMEM (1:9 v/v) for a period of 24 h upon treatment with GSH (3 mM).

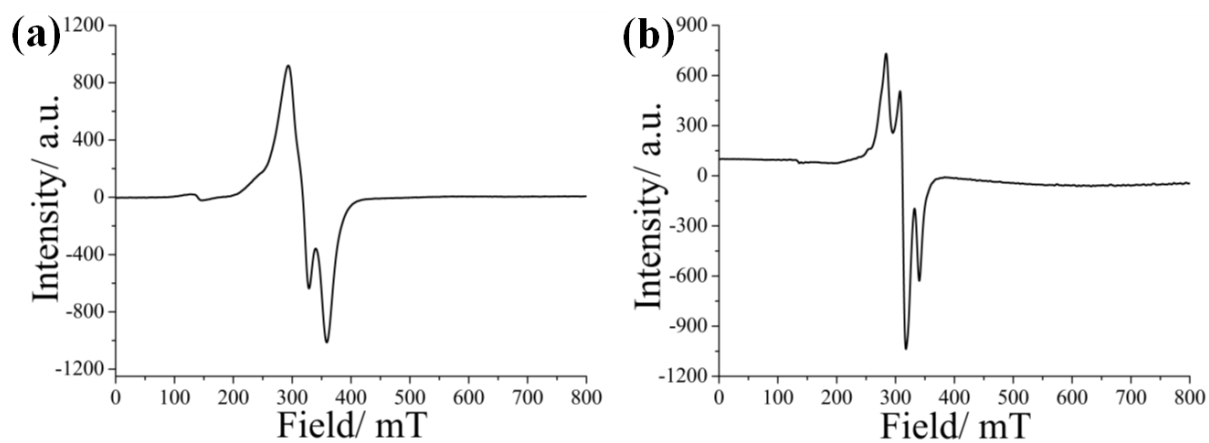

**Fig. S30** EPR spectra of complex **2** in solid (a) and solution (DMSO) (b) phases at 77K.

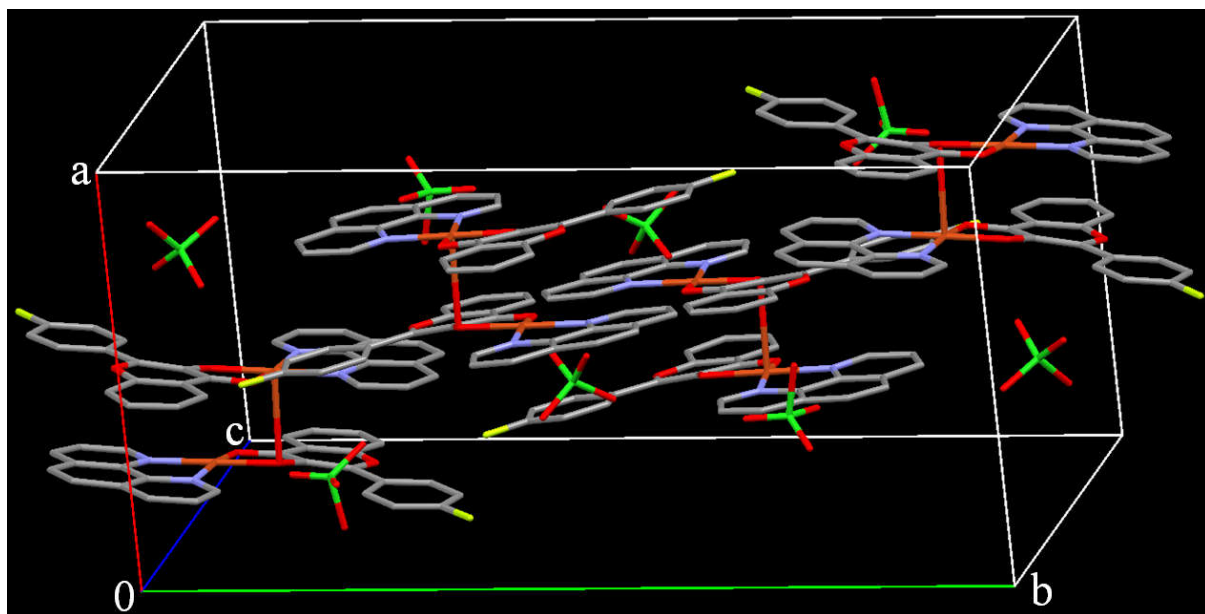

**Fig. S31** Unit cell packing diagram for the complex  $[\text{Cu}(\text{L}_1)(\text{phen})](\text{ClO}_4)$  (**2**), where  $\text{L}_1$  is monoanion of 4-fluoro-3-hydroxy flavone. The hydrogen atoms are omitted for clarity.

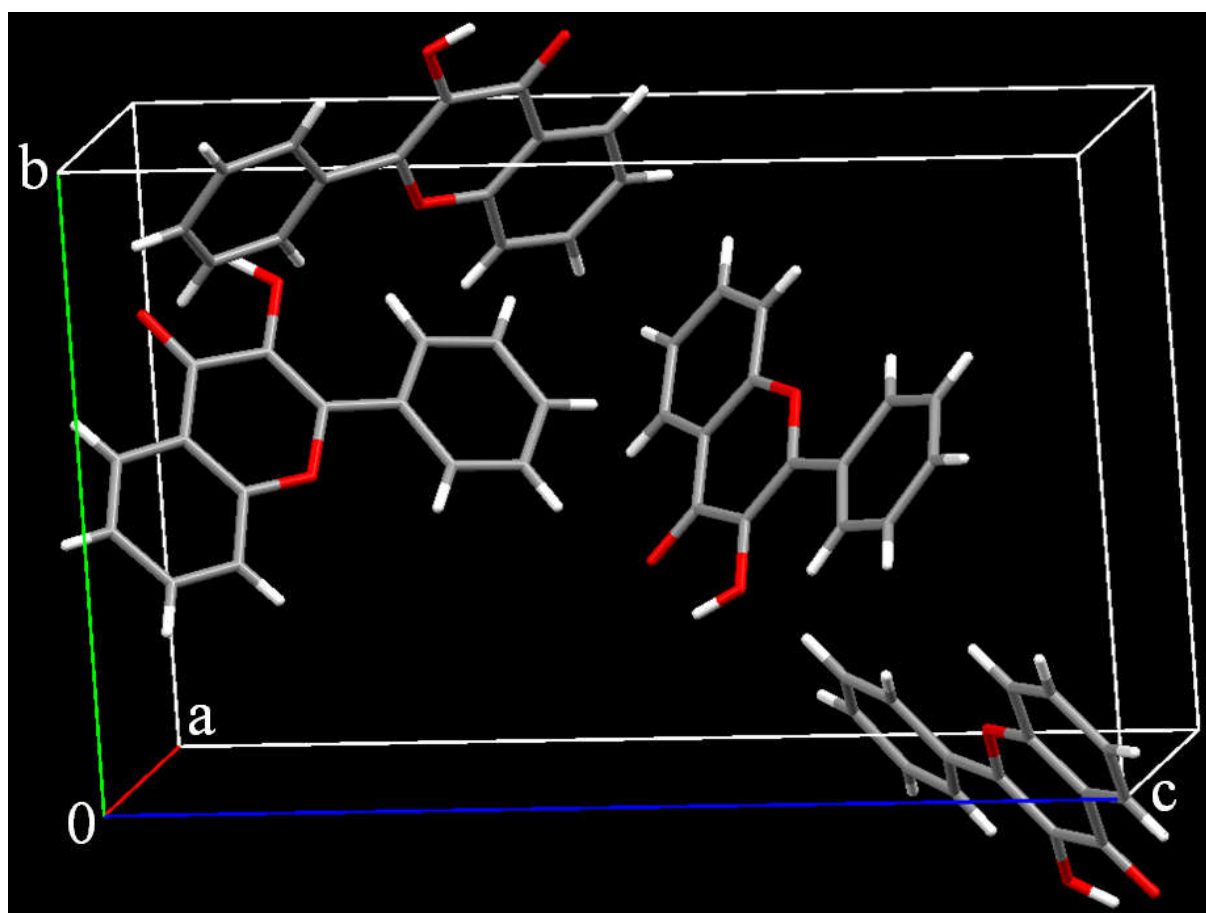

**Fig. S32** Unit cell packing diagram of ligand 3-hydroxy flavone.

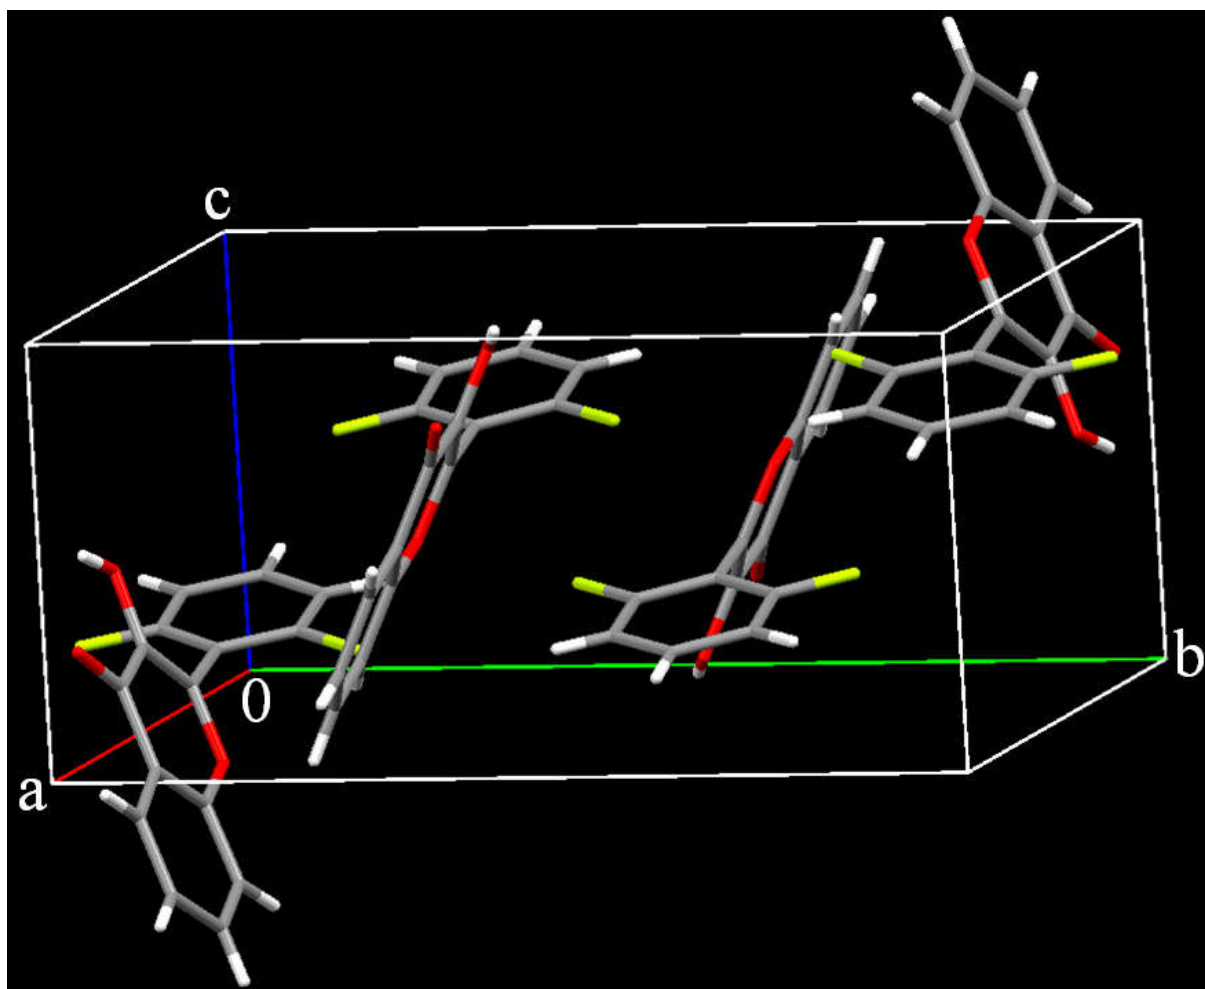

**Fig. S33** Unit cell packing diagram of ligand 2,6-difluoro-3-hydroxy flavone.

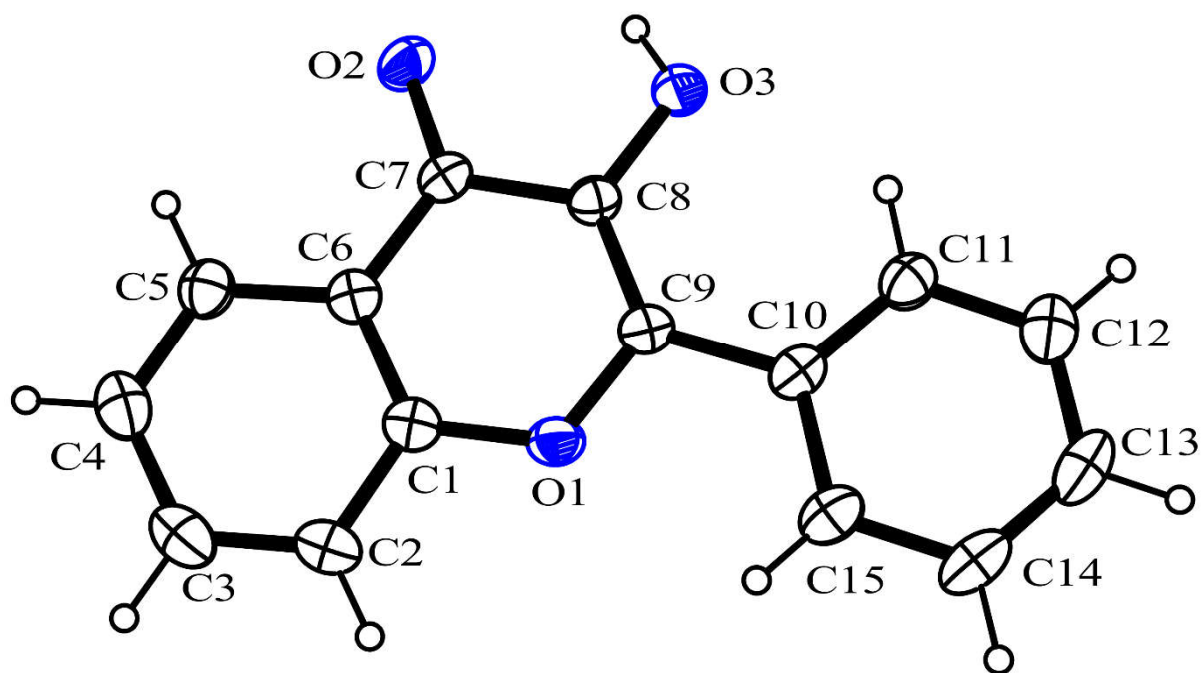

**Fig. S34** ORTEP view of the ligand 3-hydroxy flavone showing 30% probability thermal ellipsoids.

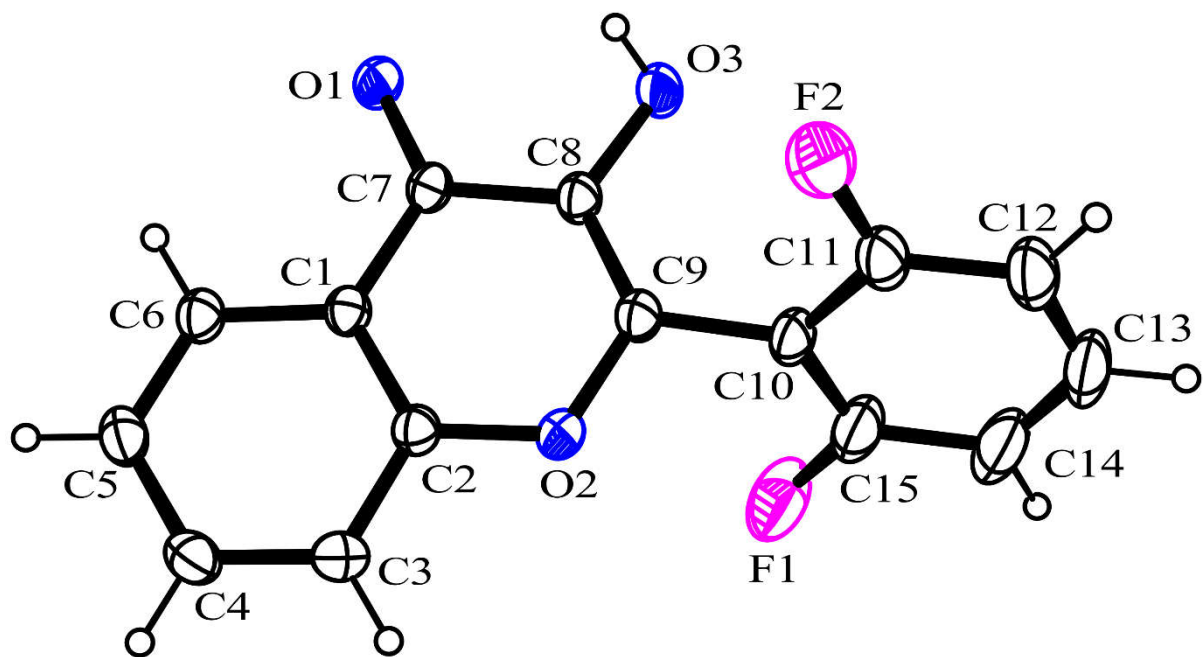

**Fig. S35** ORTEP view of the ligand 2,6-difluoro-3-hydroxy flavone showing 30% probability thermal ellipsoids.



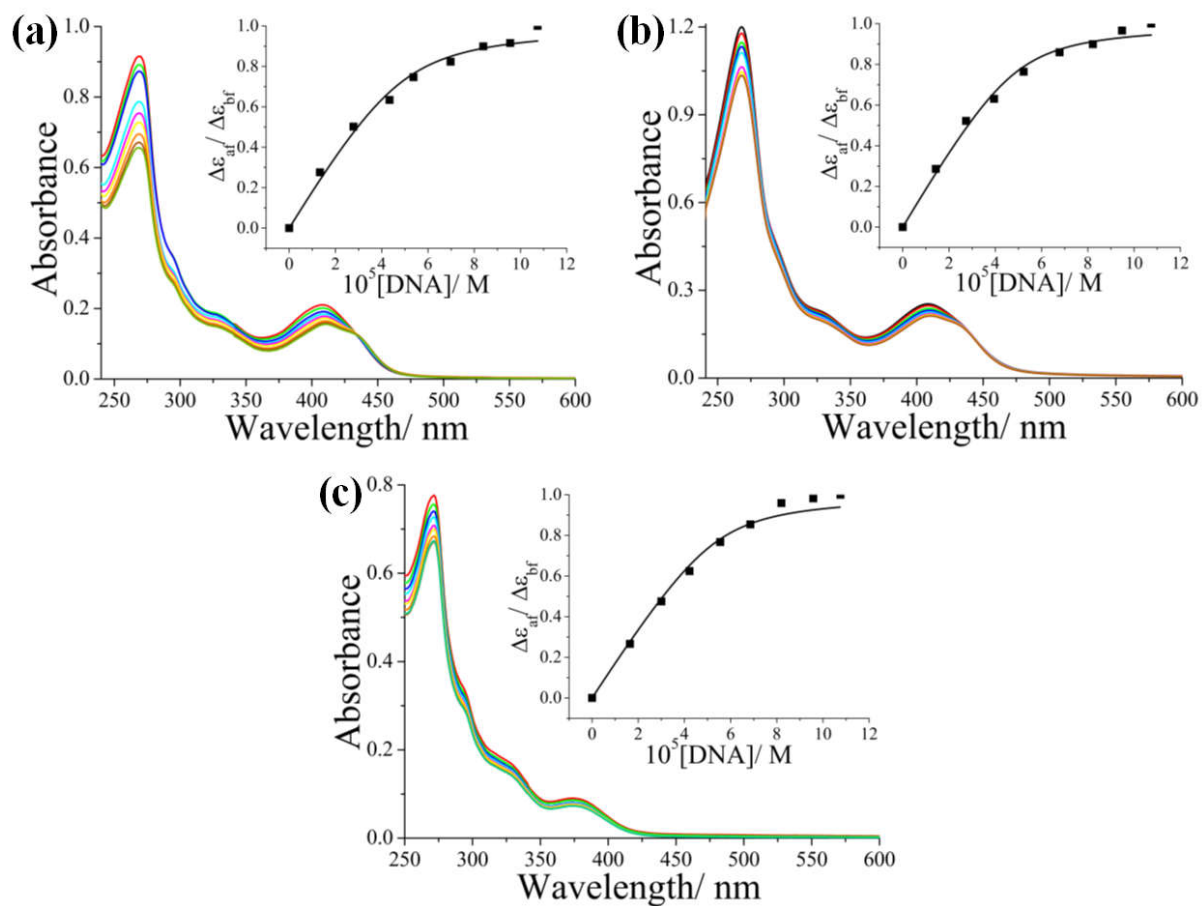

**Fig. S36** Absorption spectral traces of the complexes **1-3** (a-c) in 5 mM Tris-HCl buffer (pH 7.2) on increasing the quantity of calf thymus DNA. The inset shows the least square fits of  $\Delta\epsilon_{af}/\Delta\epsilon_{bf}$  vs.  $[\text{DNA}]$  for the complexes using McGhee-von Hippel (MvH) method.

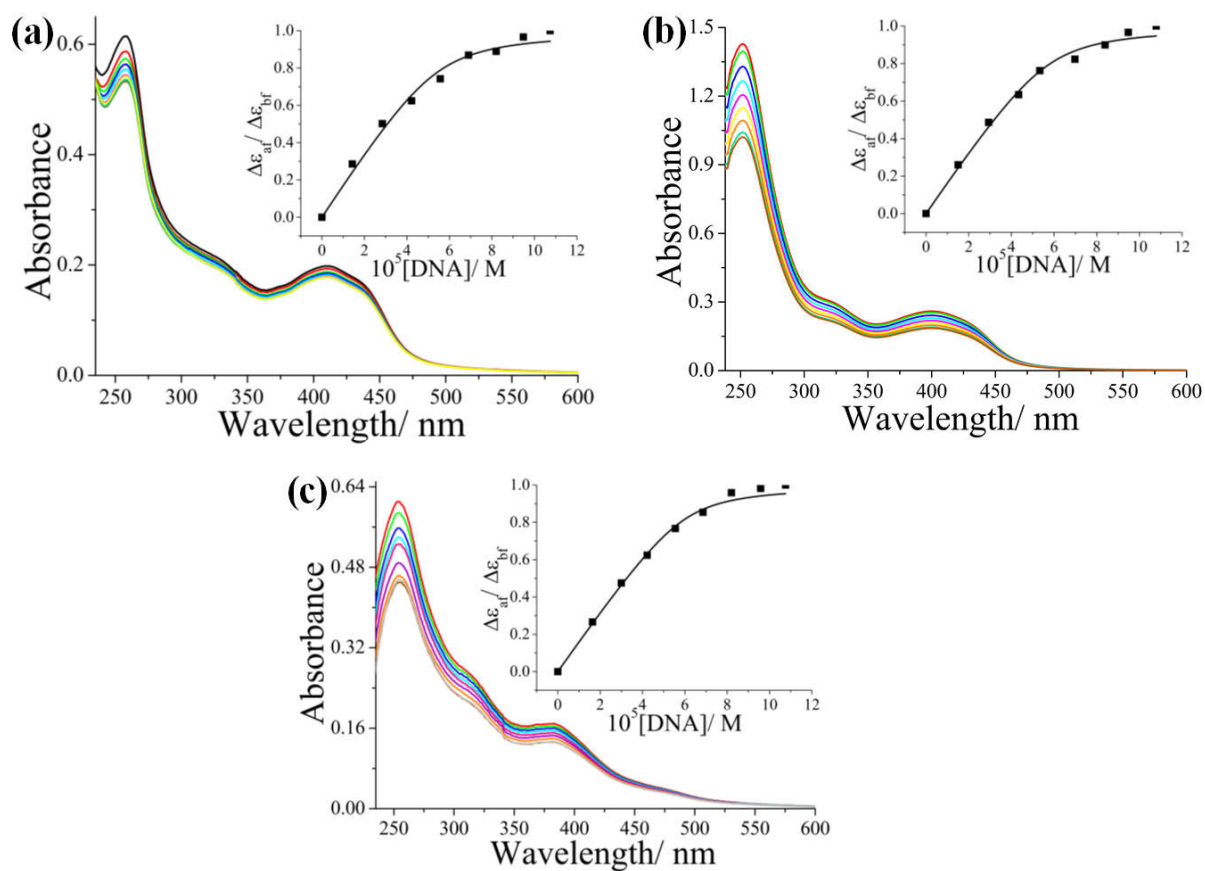

**Fig. S37** Absorption spectral traces of the complexes **4-6** (a-c) in 5 mM Tris-HCl buffer (pH 7.2) on increasing the quantity of calf thymus DNA. The inset shows the least square fits of  $\Delta\epsilon_{at}/\Delta\epsilon_{bf}$  vs.  $[\text{DNA}]$  for the complexes using McGhee-von Hippel (MvH) method.

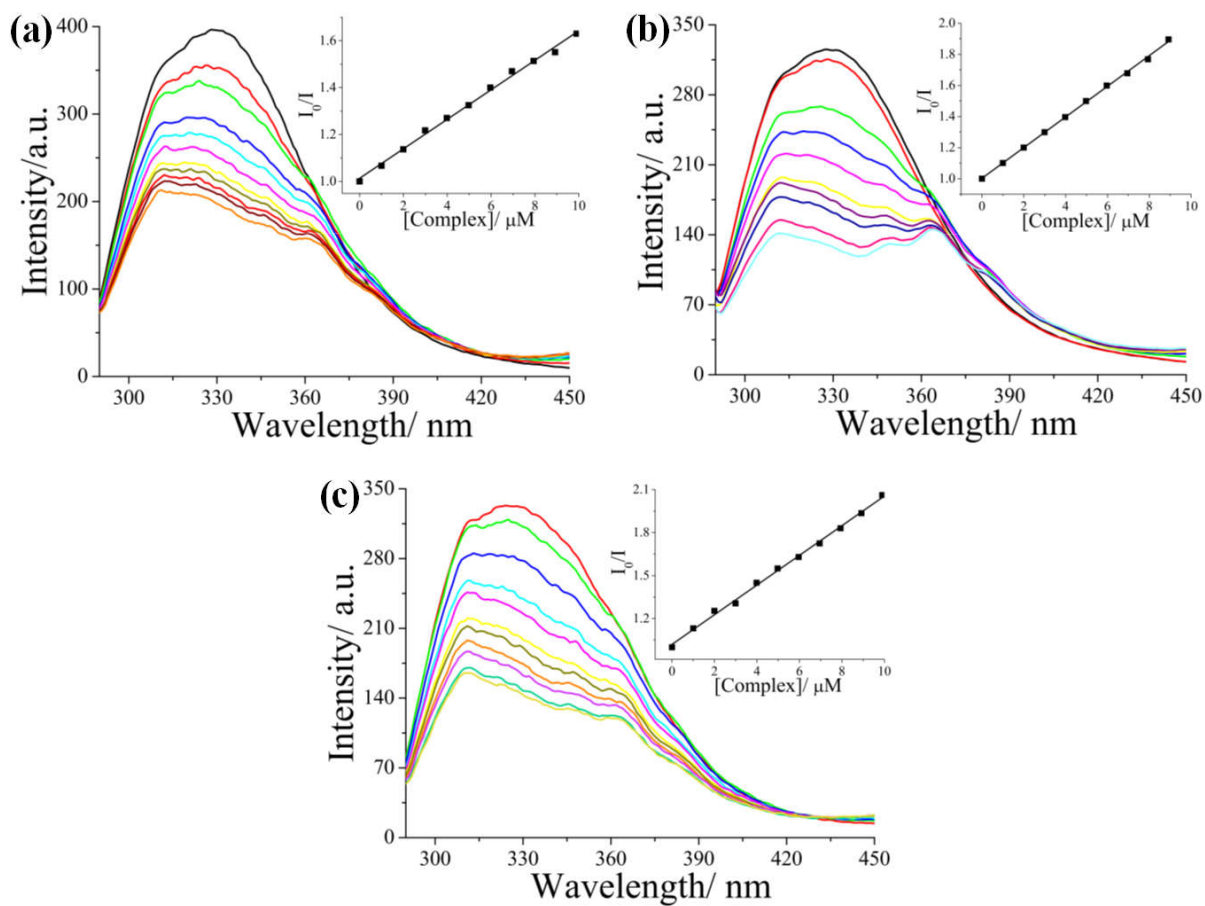

**Fig. S38** Emission spectral traces of HSA (2  $\mu\text{M}$ ) in the presence of complexes **1-3** (a-c). The inset shows the plot of  $(I_0/I)$  vs. [complex].

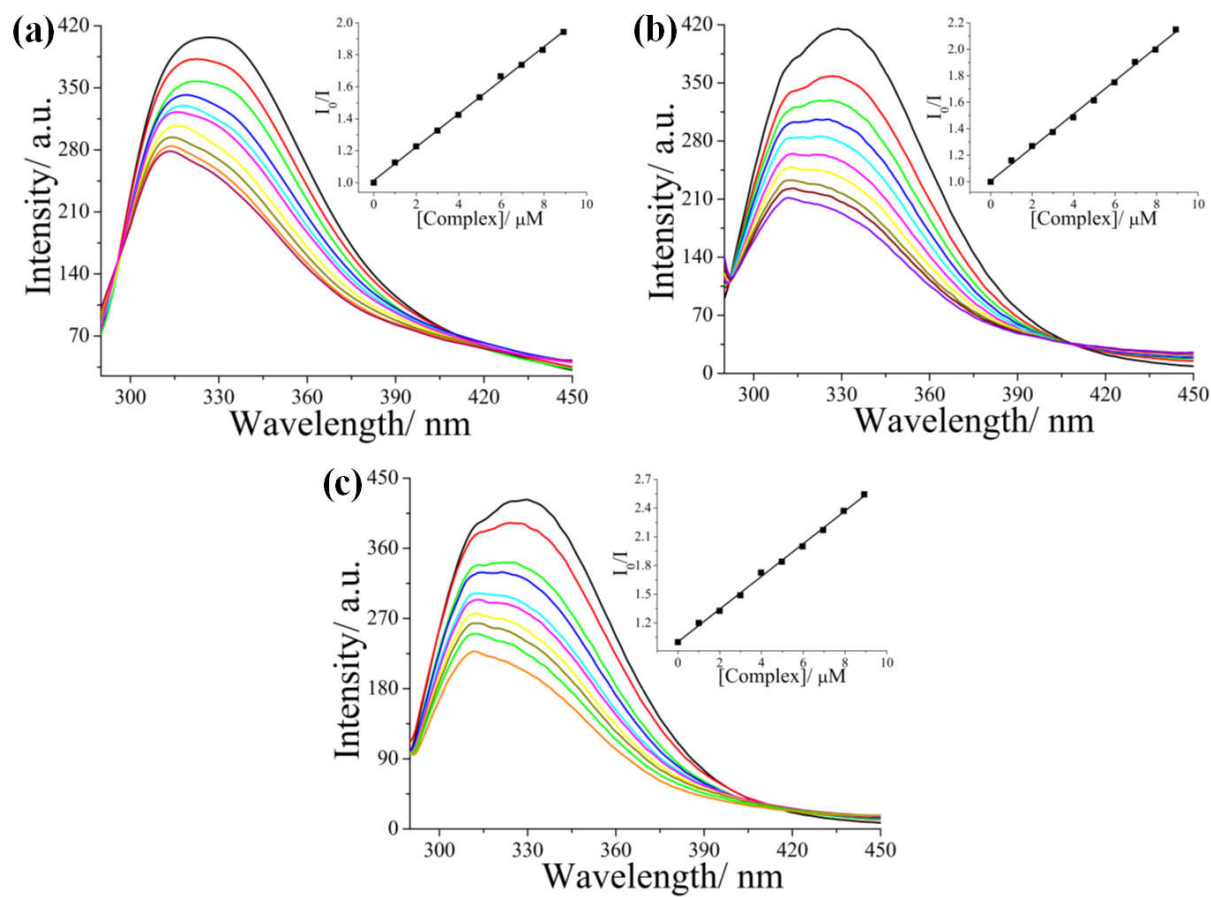

**Fig. S39** Emission spectral traces of HSA (2  $\mu\text{M}$ ) in the presence of complexes 4-6 (a-c). The inset shows the plot of ( $I_0/I$ ) vs. [complex].

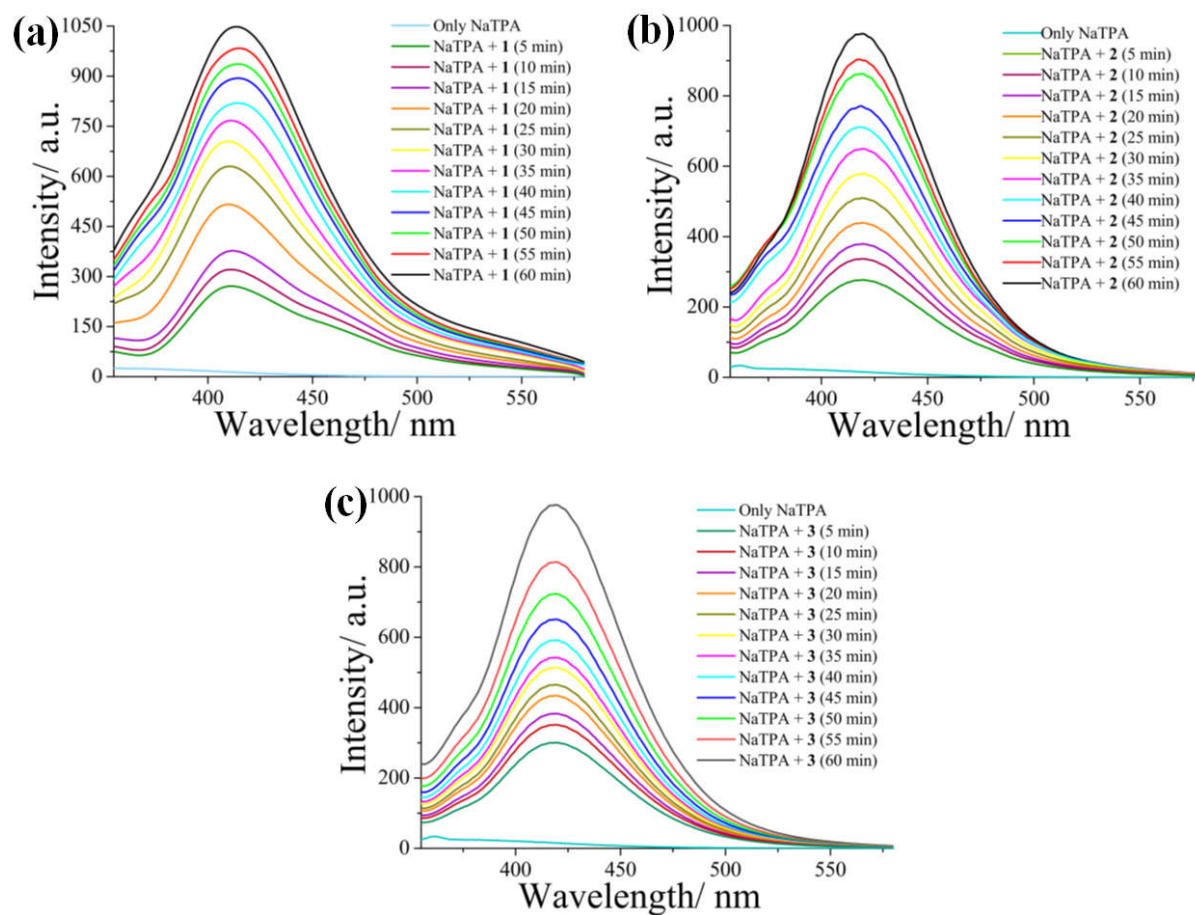

**Fig. S40** Fluorescence spectra of HTA solution resulting from the reaction of TA (2 mM) with  $\bullet\text{OH}$  radical generated by the complexes (a) **1**, (b) **2** and (c) **3** (25  $\mu\text{M}$ ) on exposure to visible light for different time interval.

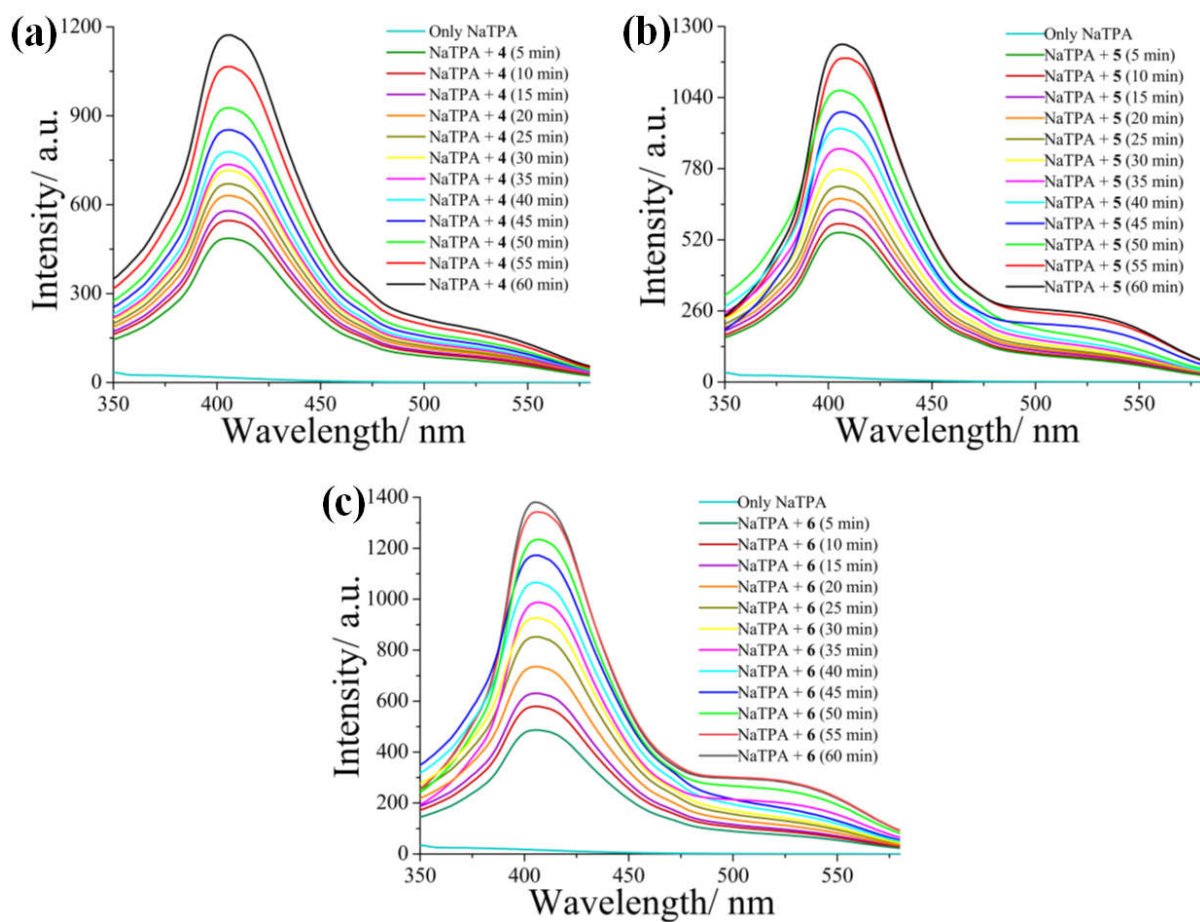

**Fig. S41** Fluorescence spectra of HTA solution resulting from the reaction of TA (2 mM) with  $\bullet\text{OH}$  radical generated by the complexes (a) **4**, (b) **5** and (c) **6** (25  $\mu\text{M}$ ) on exposure to visible light for different time interval.

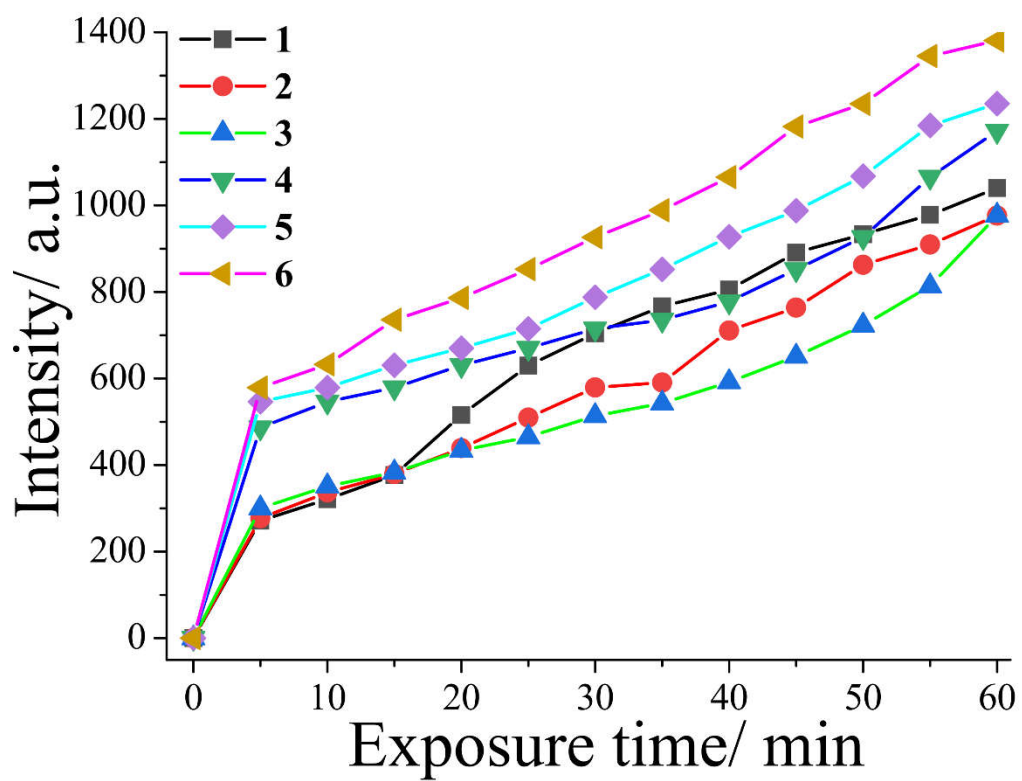

**Fig. S42** A comparison of the increase in concentration of HTA from the reaction of TA (2 mM) with  $\bullet\text{OH}$  radical generated by the complexes 1-6 (25  $\mu\text{M}$ ) on exposure to visible light for different time interval.



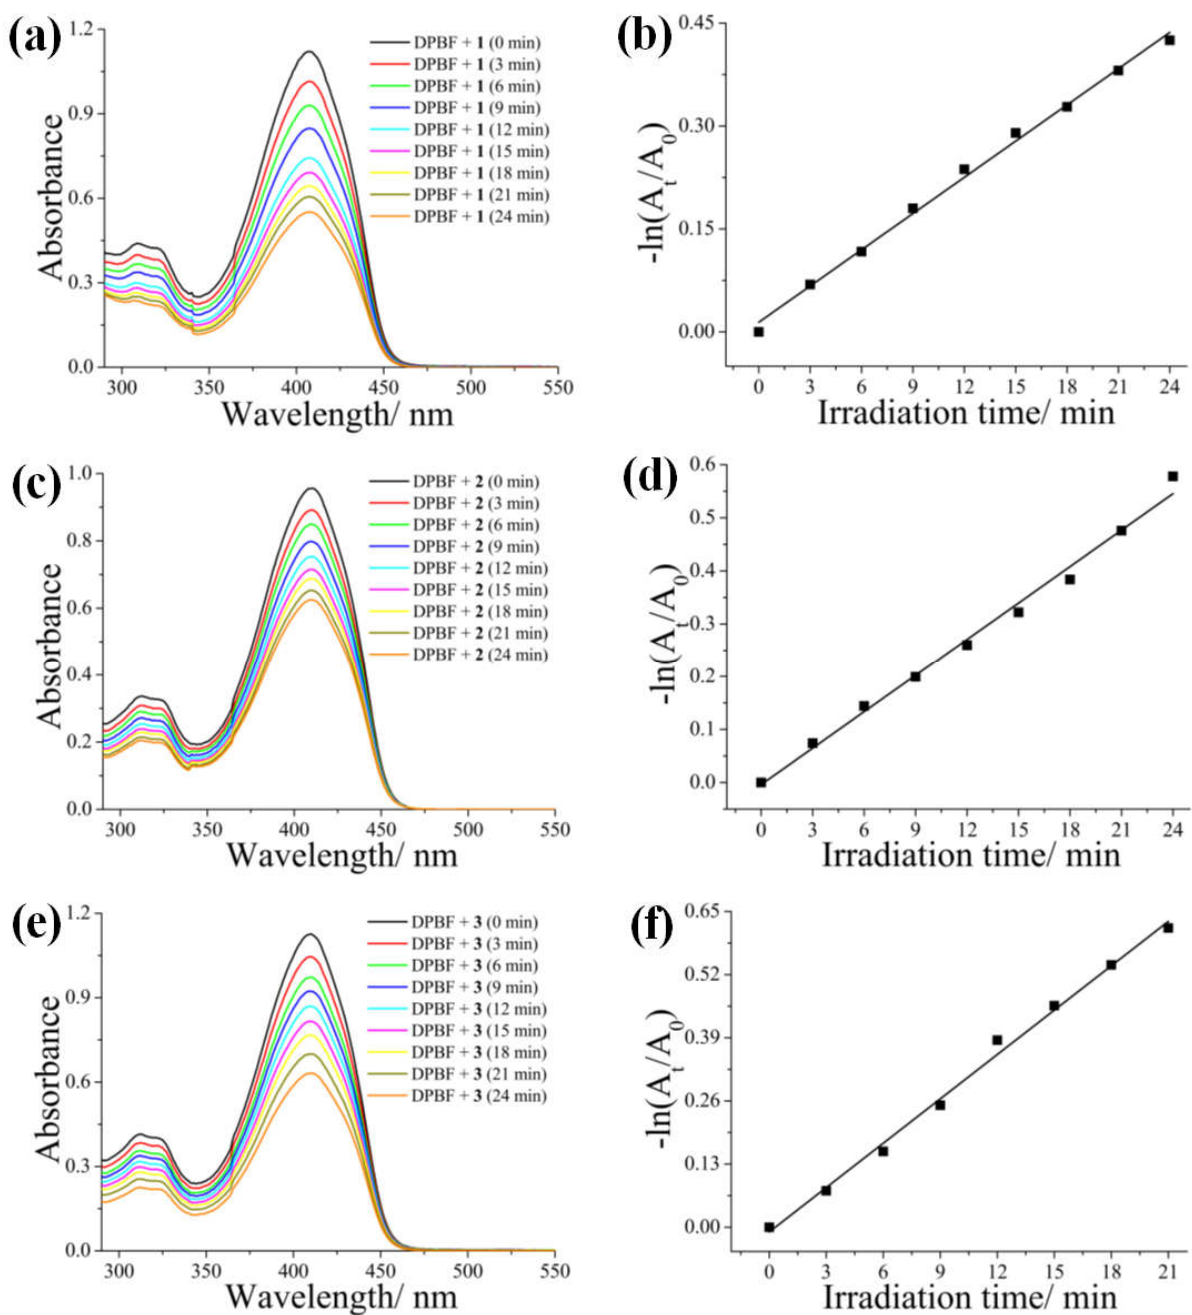

**Fig. S43** Absorption spectral traces of 1,3-diphenylisobenzofuran (DPBF) (1 mM) in presence of complexes (a) **1**, (c) **2** and (e) **3** (25 μM) on visible light irradiation for different time interval indicating generation of  $^1\text{O}_2$ . The panels (b) **1**, (d) **2** and (f) **3** show the first-order plot of absorbance of DPBF versus irradiation time for the complexes.



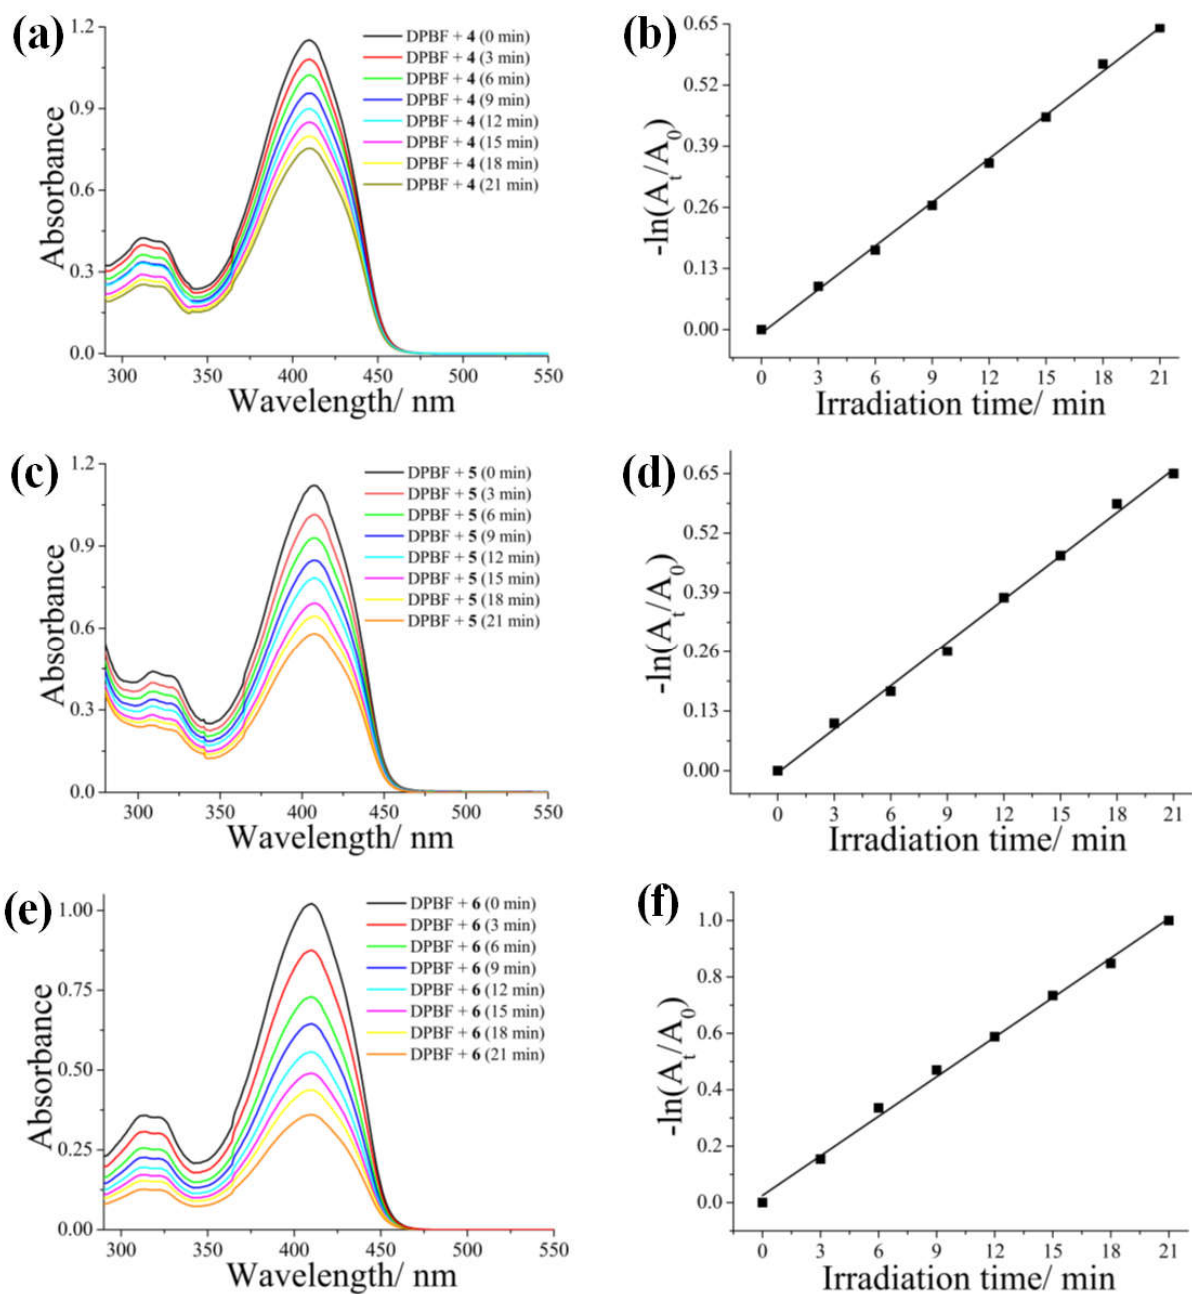

**Fig. S44** Absorption spectral traces of 1,3-diphenylisobenzofuran (DPBF) (1 mM) in presence of complexes (a) **4**, (c) **5** and (e) **6** (25 μM) on visible light irradiation for different time interval indicating generation of  $^1\text{O}_2$ . The panels (b) **4**, (d) **5** and (f) **6** show the first-order plot of absorbance of DPBF versus irradiation time for the complexes.

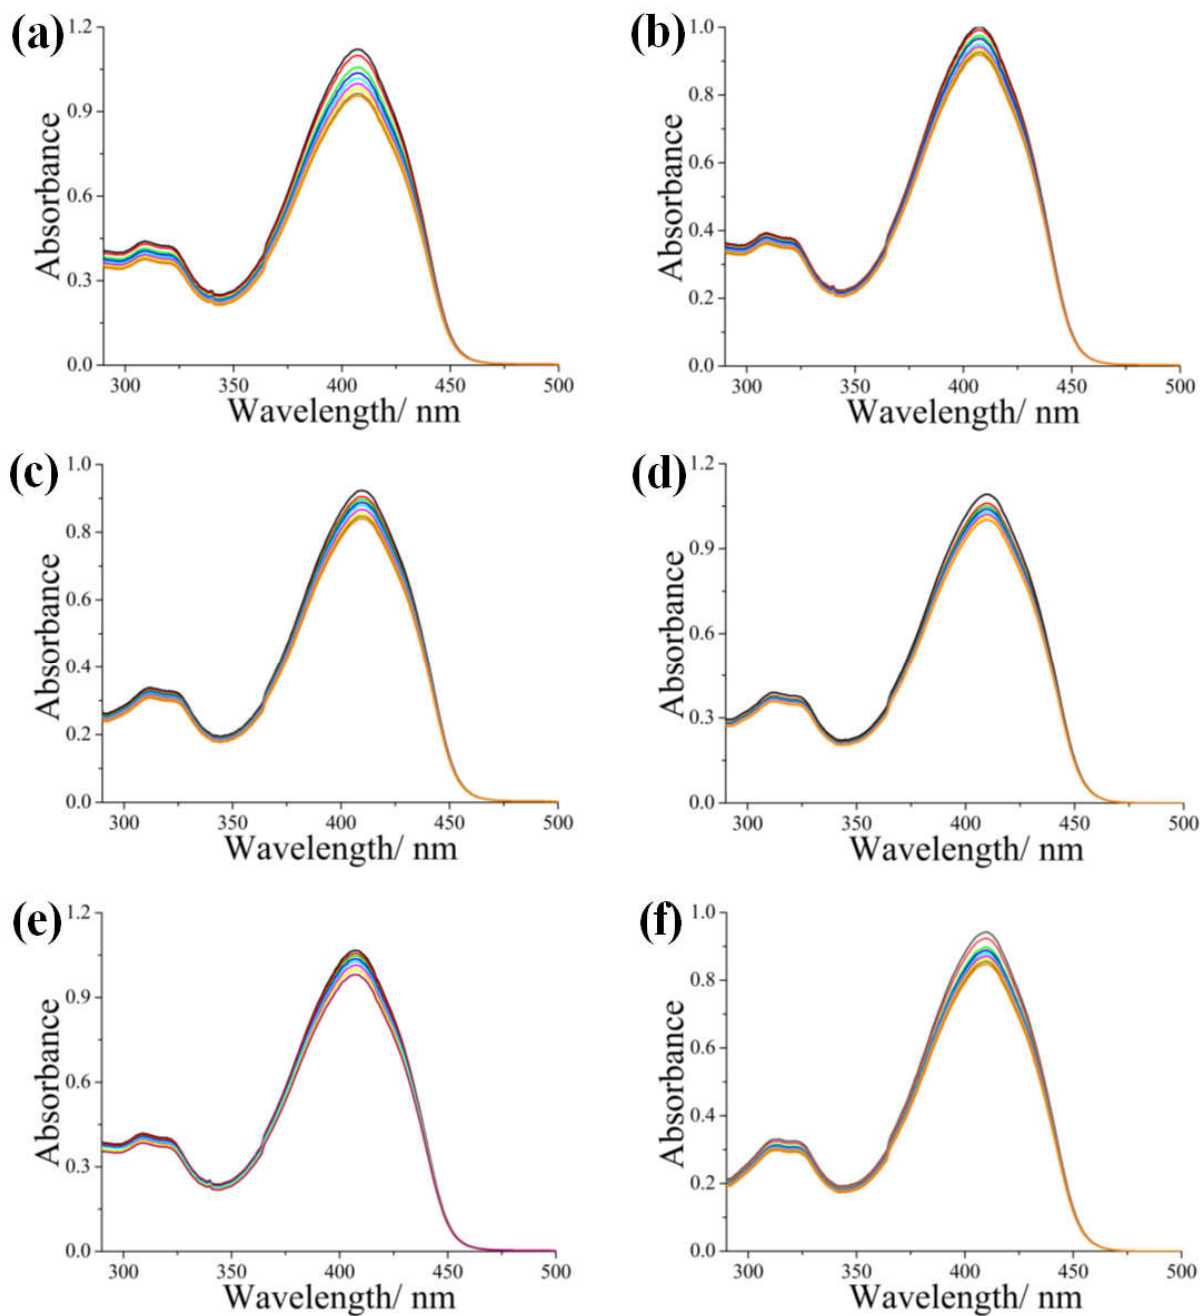

**Fig. S45** Absorption spectral traces of 1,3-diphenylisobenzofuran (DPBF) (1 mM) in presence of complexes (a) **1**, (b) **2**, (c) **3**, (d) **4**, (e) **5** and (e) **6** (25 μM) in dark at different time interval indicating that there is no significant generation of  $^1\text{O}_2$ .

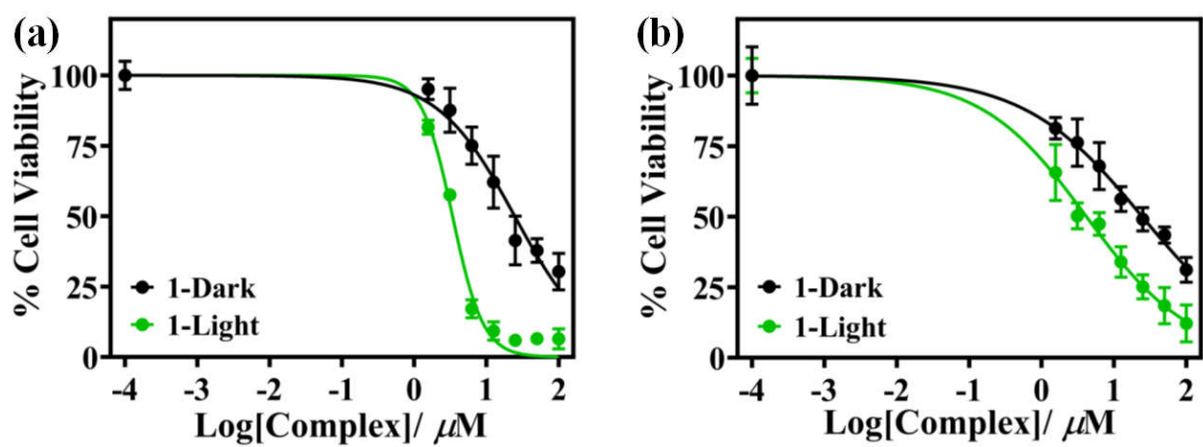

**Fig. S46** Cell viability plots showing the cytotoxic effect of complex 1 in (a) MCF-7 and (b) A549 cells in dark (black) and in the presence of visible light (green, 400-700 nm, 10 J cm<sup>-2</sup>, 1 h).

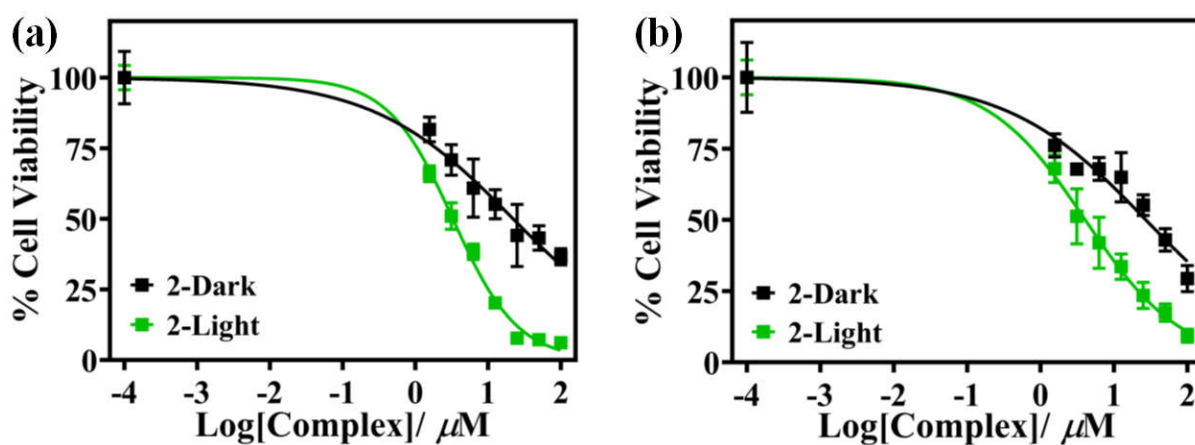

**Fig. S47** Cell viability plots showing the cytotoxic effect of complex 2 in (a) MCF-7 and (b) A549 cells in dark (black) and in the presence of visible light (green, 400-700 nm,  $10 \text{ J cm}^{-2}$ , 1 h).

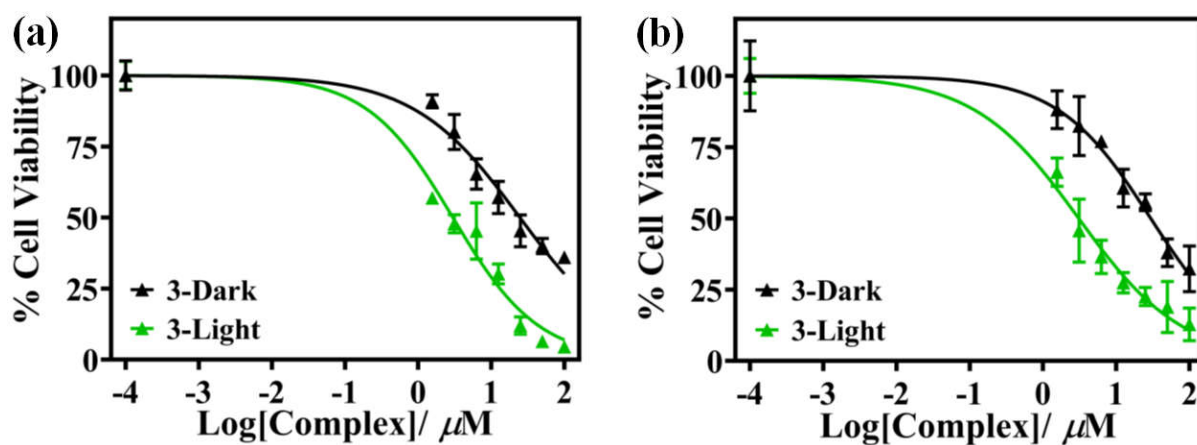

**Fig. S48** Cell viability plots showing the cytotoxic effect of complex 3 in (a) MCF-7 and (b) A549 cells in dark (black) and in the presence of visible light (green, 400-700 nm,  $10 \text{ J cm}^{-2}$ , 1 h).

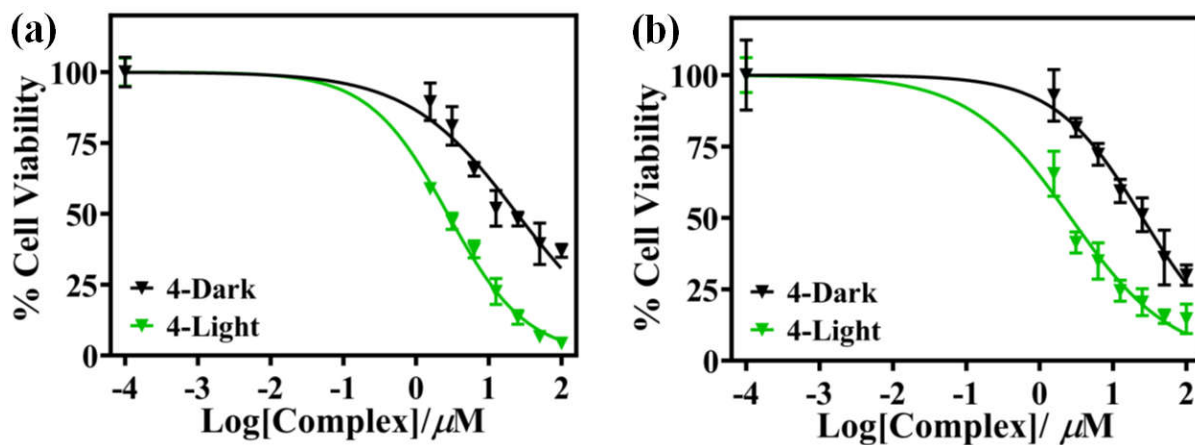

**Fig. S49** Cell viability plots showing the cytotoxic effect of complex 4 in (a) MCF-7 and (b) A549 cells in dark (black) and in the presence of visible light (green, 400-700 nm,  $10 \text{ J cm}^{-2}$ , 1 h).

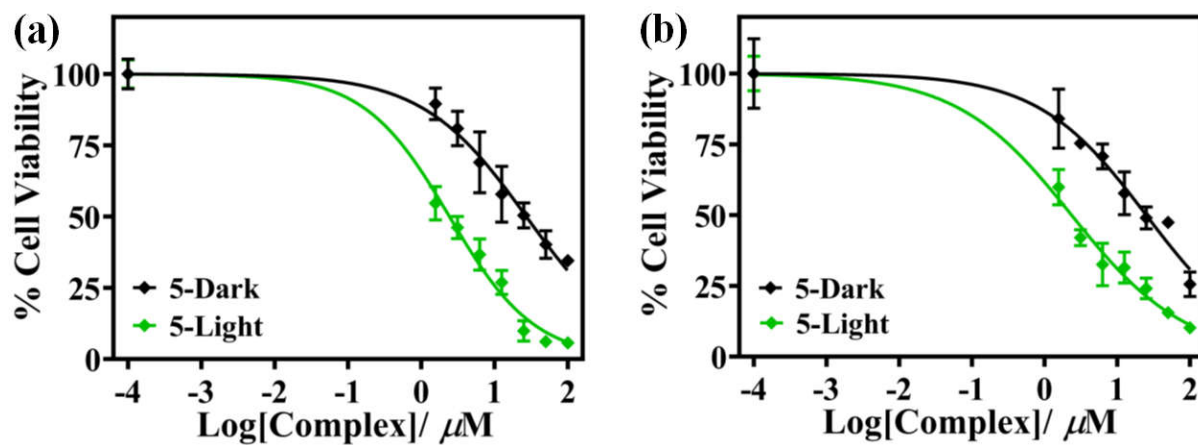

**Fig. S50** Cell viability plots showing the cytotoxic effect of complex **5** in (a) MCF-7 and (b) A549 cells in dark (black) and in the presence of visible light (green, 400-700 nm,  $10 \text{ J cm}^{-2}$ , 1 h).

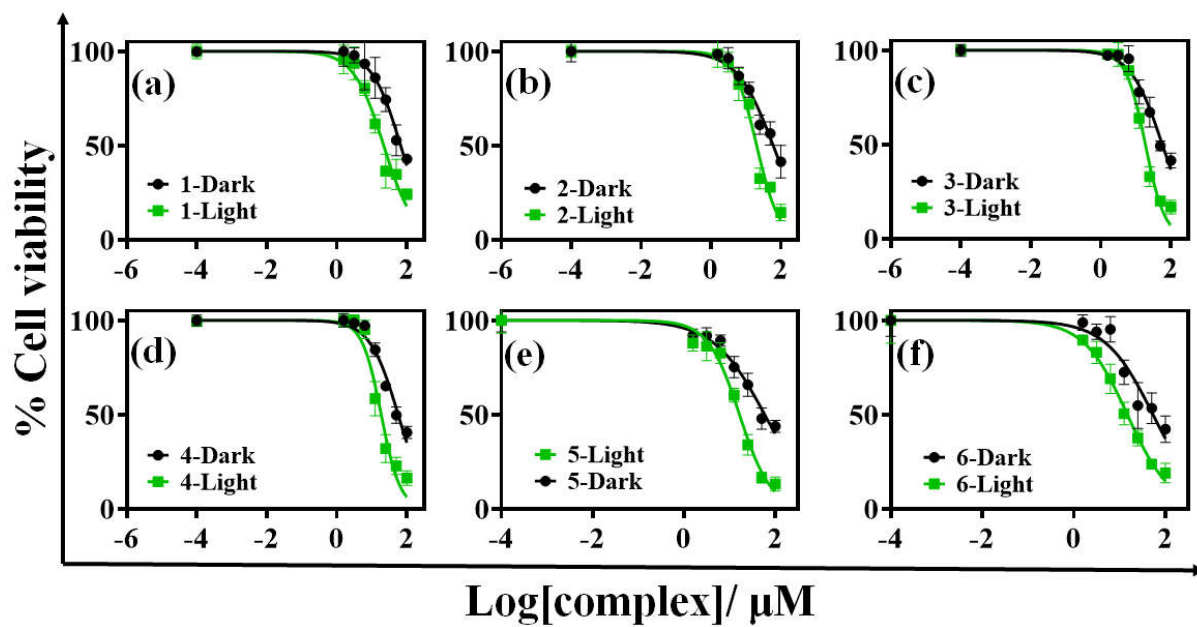

**Fig. S51** Cell viability plots showing the cytotoxic effect of the complexes 1-6 in HPL1D cells in dark (black) and in the presence of visible light (green, 400-700 nm, 10 J cm<sup>-2</sup>, 1 h).
